# Supplementary material
Source: PubMed Central journal article supplement (PMC5967677)
Supplement: CJN.09650917SupplementaryData1.pdf [file CJN.09650917SupplementaryData1.pdf]

**Supplementary Table 1 – Search strategy**

**Table 1: Summary of search strategies including MESH terms, text words and combinations used in MEDLINE, Embase, and PsycINFO searches (via OvidSP)**

| Keyword                                                                                        | MEDLINE                                                                                                                                                                                                                                                                                                                                                                                                                                                                                                                                                                                                                            | Embase                                                                                                                                                                                                                                                                                                                                                                                                                                                                                                                                                                                                                    | PsycINFO                                                                                                                                                                                                                                                                                                                                                                                                                                                                                                                                                                                                                                                                                                         |
|------------------------------------------------------------------------------------------------|------------------------------------------------------------------------------------------------------------------------------------------------------------------------------------------------------------------------------------------------------------------------------------------------------------------------------------------------------------------------------------------------------------------------------------------------------------------------------------------------------------------------------------------------------------------------------------------------------------------------------------|---------------------------------------------------------------------------------------------------------------------------------------------------------------------------------------------------------------------------------------------------------------------------------------------------------------------------------------------------------------------------------------------------------------------------------------------------------------------------------------------------------------------------------------------------------------------------------------------------------------------------|------------------------------------------------------------------------------------------------------------------------------------------------------------------------------------------------------------------------------------------------------------------------------------------------------------------------------------------------------------------------------------------------------------------------------------------------------------------------------------------------------------------------------------------------------------------------------------------------------------------------------------------------------------------------------------------------------------------|
| Population = Children and/or adolescents                                                       | Exp Child/ OR Child\$.tw OR Girl\$.tw OR Boy\$.tw or P?ediatric\$.tw OR Exp Pediatrics/ OR Adolescent/ OR Adolescens\$.tw OR Teen\$.tw OR Youth\$.tw OR Young Adult/ OR Young adult.tw                                                                                                                                                                                                                                                                                                                                                                                                                                             | Exp Child/ OR Child\$.tw OR Girl\$.tw OR Boy\$.tw OR P?ediatric\$.tw OR Exp pediatrics/ OR Exp Adolescent/ OR Adolescens\$.tw OR Teen\$.tw OR Youth\$.tw OR Exp young adult/ OR Young adult.tw                                                                                                                                                                                                                                                                                                                                                                                                                            | Exp Pediatrics/ OR Exp Childhood Development/ OR Exp Adolescent Development/ OR Child\$.tw OR Girl\$.tw OR Boy\$.tw OR P?ediatric\$.tw OR Adolescens\$.tw OR Teen\$.tw OR Youth\$.tw OR Young adult.tw                                                                                                                                                                                                                                                                                                                                                                                                                                                                                                           |
| Exposure = CKD <sup>1</sup> (mild-to-moderate stage CKD, dialysis, and kidney transplantation) | Exp Kidney Diseases/ OR (kidney adj3 (insuffic\$ or diseas\$)).tw OR (renal adj3 (insuffic\$ or diseas\$)).tw OR (pre-dialysis or predialysis).tw OR exp Renal Replacement Therapy/ OR H?emodialysis.tw OR (hemofiltration or haemofiltration).tw OR (hemodiafiltration or haemodiafiltration).tw OR dialysis.tw OR (PD or CAPD or CCPD or APD).tw OR peritoneal dialysis.tw (end-stage renal or end-stage kidney or endstage renal or endstage kidney).tw OR (ESRF or ESKF or ESRD or ESKD).tw OR (chronic kidney or chronic renal).tw OR (CKF or CKD or CRF or CRD).tw OR ur?emi\$.tw OR Kidney Transplantation/ OR (dysfunction | Exp kidney disease/ OR (kidney adj3 (insuffic\$ or diseas\$)).tw OR (renal adj3 (insuffic\$ or diseas\$)).tw OR (pre-dialysis or predialysis).tw OR exp renal replacement therapy/ OR (hemodialysis or haemodialysis).tw OR (hemofiltration or haemofiltration).tw OR (hemodiafiltration or haemodiafiltration).tw OR dialysis.tw OR (PD or CAPD or CCPD or APD).tw OR peritoneal dialysis.tw OR (end-stage renal or end-stage kidney or endstage renal or endstage kidney).tw OR (ESRF or ESKF or ESRD or ESKD).tw OR (chronic kidney or chronic renal).tw OR (CKF or CKD or CRF or CRD).tw OR ur?emi\$.tw OR exp kidney | Exp Kidney Diseases/ OR exp Kidneys/ OR exp Organ OR Transplantation/ or exp Dialysis/ OR (kidney adj3 (insuffic\$ or diseas\$)).tw OR (renal adj3 (insuffic\$ or diseas\$)).tw OR (pre-dialysis or predialysis).tw OR (hemodialysis or haemodialysis).tw OR (hemofiltration or haemofiltration).tw OR (hemodiafiltration or haemodiafiltration).tw OR dialysis.tw OR (PD or CAPD or CCPD or APD).tw OR peritoneal dialysis.tw OR (end-stage renal or end-stage kidney or endstage renal or endstage kidney).tw OR (ESRF or ESKF or ESRD or ESKD).tw OR (chronic kidney or chronic renal).tw OR (CKF or CKD or CRF or CRD).tw OR ur?emi\$.tw OR (dysfunction adj3 (kidney or renal)).tw OR nephrotic syndrome.tw |

Supplemental material is neither peer-reviewed nor thoroughly edited by CJASN. The authors alone are responsible for the accuracy and presentation of the material.

| Keyword                                                                                            | MEDLINE                                                                                                                                                                                                                                                                                                                                                                                                        | Embase                                                                                                                                                                                                                                                                                                                                                                                                                    | PsycINFO                                                                                                                                                                                                                                                                                                                                                                                                                                                                          |
|----------------------------------------------------------------------------------------------------|----------------------------------------------------------------------------------------------------------------------------------------------------------------------------------------------------------------------------------------------------------------------------------------------------------------------------------------------------------------------------------------------------------------|---------------------------------------------------------------------------------------------------------------------------------------------------------------------------------------------------------------------------------------------------------------------------------------------------------------------------------------------------------------------------------------------------------------------------|-----------------------------------------------------------------------------------------------------------------------------------------------------------------------------------------------------------------------------------------------------------------------------------------------------------------------------------------------------------------------------------------------------------------------------------------------------------------------------------|
|                                                                                                    | adj3 (kidney or renal)).tw OR exp Nephrotic Syndrome/ OR nephrotic syndrome.tw OR exp Nephrosis, Lipoid/ OR lipoid nephrosis.tw                                                                                                                                                                                                                                                                                | transplantation/ OR (dysfunction adj3 (kidney or renal)).tw OR exp nephrotic syndrome/ OR nephrotic syndrome.tw OR exp lipoid nephrosis/ OR lipoid nephrosis.tw                                                                                                                                                                                                                                                           |                                                                                                                                                                                                                                                                                                                                                                                                                                                                                   |
| Methodology = Observational studies, inclusive of case-control, cross-sectional and cohort studies | Exp Epidemiologic Studies/ OR Case control.tw OR (cohort adj (study or studies)).tw OR Cohort analy\$.tw OR (follow up adj (study or studies)).tw OR (observational adj (study or studies)).tw OR Longitudinal.tw OR Retrospective.tw OR Cross sectional.tw OR exp Meta-Analysis/ OR Meta anal\$.tw OR Metaanaly\$.tw OR (systematic adj (review\$1 or overview\$1)).tw                                        | Exp epidemiology/ OR Case control.tw OR (cohort adj (study or studies)).tw OR Cohort analy\$.tw OR (follow up adj (study or studies)).tw OR (observational adj (study or studies)).tw OR Longitudinal.tw OR Retrospective.tw OR Cross sectional.tw OR Exp meta-analysis/ OR Meta anal\$.tw OR Metaanaly\$.tw OR (systematic adj (review\$1 or overview\$1)).tw                                                            | Exp Epidemiology/ OR Case control.tw OR (cohort adj (study or studies)).tw OR Cohort analy\$.tw OR (follow up adj (study or studies)).tw OR (observational adj (study or studies)).tw OR Longitudinal.tw OR Retrospective.tw OR Cross sectional.tw OR Exp Meta Analysis/ OR Exp “Literature Review”/ OR Meta anal\$.tw OR Metaanaly\$.tw OR (systematic adj (review\$1 or overview\$1)).tw                                                                                        |
| Comparator = None                                                                                  | No search strategy                                                                                                                                                                                                                                                                                                                                                                                             | No search strategy                                                                                                                                                                                                                                                                                                                                                                                                        | No search strategy                                                                                                                                                                                                                                                                                                                                                                                                                                                                |
| Outcome = All neurocognitive domains                                                               | Exp Emotional Intelligence/ OR exp Intelligence Tests/ OR exp Intelligence/ OR Intell\$.tw OR Academic.tw OR Educatio\$.tw OR exp Education/ OR IQ.tw OR exp Cognition OR Cogniti\$.tw OR (outcome adj3 (education\$ or academic or cogniti\$ or psychological or neurocognit\$)).tw OR (intell\$ adj3 (quotient or def\$ or abilit\$)).tw OR exp Neuropsychological Tests/ OR (Wechsler adj3 (intelligen\$ or | Exp intelligence/ OR exp emotional intelligence/ OR exp intelligence test/ OR Intell\$.tw OR Academic.tw OR Educatio\$.tw OR exp education/ OR IQ.tw OR exp cognition assessment/ OR exp cognition/ OR Cogniti\$.tw OR (outcome adj3 (education\$ or academic or cogniti\$ or neurocognit\$)).tw OR (intell\$ adj3 (quotient or def\$ or abilit\$)).tw OR exp neuropsychological test/ OR (Wechsler adj3 (intelligen\$ or | Exp Emotional Intelligence/ OR exp Intelligence Quotient/ OR exp Cognitive Ability/ OR exp Intelligence Measures/ OR exp Intelligence/ OR exp Academic Aptitude/ OR exp Academic Achievement/ OR exp Academic Failure/ OR exp Psychological Assessment/ OR exp Cognition/ OR exp Psychological Development/ OR exp Cognitive Impairment/ OR exp Cognitive Processes/ OR exp Performance Tests/ OR exp Attention/ OR exp Executive Function/ OR exp Memory/ OR exp Verbal Fluency/ |

| Keyword | MEDLINE                                                                                                                                                                                                                                                                                                                                                                                                                                                                                                                                                                                                                                                                                                                                                                                                                                                                                                      | Embase                                                                                                                                                                                                                                                                                                                                                                                                                                                                                                                                                                                                                                                                                                                                                                                                                                                                                                                  | PsycINFO                                                                                                                                                                                                                                                                                                                                                                                                                                                                                                                                                                                                                                                                                                                                                                                                                                                                                                                                                                                                                                                                                                                                                                                                                           |
|---------|--------------------------------------------------------------------------------------------------------------------------------------------------------------------------------------------------------------------------------------------------------------------------------------------------------------------------------------------------------------------------------------------------------------------------------------------------------------------------------------------------------------------------------------------------------------------------------------------------------------------------------------------------------------------------------------------------------------------------------------------------------------------------------------------------------------------------------------------------------------------------------------------------------------|-------------------------------------------------------------------------------------------------------------------------------------------------------------------------------------------------------------------------------------------------------------------------------------------------------------------------------------------------------------------------------------------------------------------------------------------------------------------------------------------------------------------------------------------------------------------------------------------------------------------------------------------------------------------------------------------------------------------------------------------------------------------------------------------------------------------------------------------------------------------------------------------------------------------------|------------------------------------------------------------------------------------------------------------------------------------------------------------------------------------------------------------------------------------------------------------------------------------------------------------------------------------------------------------------------------------------------------------------------------------------------------------------------------------------------------------------------------------------------------------------------------------------------------------------------------------------------------------------------------------------------------------------------------------------------------------------------------------------------------------------------------------------------------------------------------------------------------------------------------------------------------------------------------------------------------------------------------------------------------------------------------------------------------------------------------------------------------------------------------------------------------------------------------------|
|         | memory)).tw OR (neuropsychiatric adj3 (inventory or battery)).tw OR exp Executive function/ OR exp Memory/ OR exp Language/ OR exp Attention/ OR exp Language/ OR exp language tests/ OR exp Visual perception/ OR exp Space perception/ OR Psychomotor performance.tw OR Global cognitive function\$.tw OR (memory adj3 (disorder\$ or function\$ or def\$)).tw OR (Speed adj1 (processing or response)).tw OR (visuospatial adj1 (perception or function)).tw OR Verbal fluency.tw OR (flexibility adj1 (cognitive or mental)).tw OR exp “Inhibition (Psychology)”/ OR exp Problem Solving/ OR Social cognition.tw OR (Set adj1 (switching or shifting)).tw OR exp Mathematics/ OR exp discrimination learning/ OR exp verbal learning/ OR (neurocognit\$ adj3 (function\$ or def\$ or abnormal\$ or outcome\$ or disorder\$ or illness\$ or problem\$ or wellbeing or well-being or health or stress)).tw | memory)).tw OR (neuropsychiatric adj3 (inventory or battery)).tw OR Neuropsychological test\$.tw OR exp executive function/ OR exp memory/ OR exp language/ OR exp attention/ OR exp language test/ OR exp depth perception/ OR Psychomotor performance.tw OR Global cognitive function\$.tw OR (memory adj3 (disorder\$ or function\$ or def\$)).tw OR (Speed adj1 (processing or response)).tw OR (visuospatial adj1 (perception or function)).tw OR Verbal fluency.tw OR (flexibility adj1 (cognitive or mental)).tw OR exp “inhibition (psychology)”/ OR exp problem solving/ OR Social cognition.tw OR (Set adj1 (switching or shifting)).tw OR exp mathematics/ OR exp discrimination learning/ OR exp spatial learning/ OR exp verbalization/ OR (neurocognit\$ adj3 (function\$ or def\$ or abnormal\$ or outcome\$ or disorder\$ or illness\$ or problem\$ or wellbeing or well-being or health or stress)).tw | OR exp Learning Disorders/ OR exp Visual Perception/ OR exp Spatial Perception/ OR exp Perceptual Motor Processes/ OR exp Response Inhibition/ OR exp “Interference (Learning)”/ OR exp Dual Task Performance/ OR exp discrimination learning/ OR exp “interference (learning)”/ OR exp nonverbal learning/ OR exp perceptual learning/ OR exp spatial learning/ OR exp verbal learning/ OR Intell\$.tw OR Academic.tw OR Educatio\$.tw OR IQ.tw OR Cogniti\$.tw OR (outcome adj3 (education\$ or academic or cognitio\$ or neurocognit\$)).tw OR (intell\$ adj3 (quotient or def\$ or abilit\$)).tw OR exp neuropsychological test/ OR (Wechsler adj3 (intelligen\$ or memory)).tw OR (neuropsychiatric adj3 (inventory or battery)).tw OR Neuropsychological test\$.tw OR Psychomotor performance.tw OR Global cognitive function\$.tw OR (memory adj3 (disorder\$ or function\$ or def\$)).tw OR (Speed adj1 (processing or response)).tw OR (visuospatial adj1 (perception or function)).tw OR Verbal fluency.tw OR (flexibility adj1 (cognitive or mental)).tw OR Social cognition.tw OR (Set adj1 (switching or shifting)).tw OR exp Cognitive Processing Speed/ OR exp Reaction Time/ OR (function\$ adj3 neurocognit\$).tw |

<sup>1</sup>CKD: chronic kidney disease

Supplemental material is neither peer-reviewed nor thoroughly edited by CJASN. The authors alone are responsible for the accuracy and presentation of the material.

**Supplementary Table 2: Characteristics of included studies**

|                   | Title, author                                                                              | Country       | Study type      | Age (years)<br>Mean (SD) | n  | Patient cohort        | Study outcome(s)     | Outcome measure(s)                                                                                                          |                                                                                                                                                                                   | Follow-up time                     |
|-------------------|--------------------------------------------------------------------------------------------|---------------|-----------------|--------------------------|----|-----------------------|----------------------|-----------------------------------------------------------------------------------------------------------------------------|-----------------------------------------------------------------------------------------------------------------------------------------------------------------------------------|------------------------------------|
|                   |                                                                                            |               |                 |                          |    |                       |                      | Test(s)                                                                                                                     | Indices/subtest(s)                                                                                                                                                                |                                    |
| 1                 | Amr 2013                                                                                   | Egypt         | Cross-sectional | 10.4 (3.80)              | 12 | CKD I-V               | Intelligence         | WISC (Arabic version)                                                                                                       | Full-Scale IQ<br>Verbal IQ<br>Performance IQ                                                                                                                                      | N/A                                |
|                   |                                                                                            |               |                 | 13.5 (2.90)              | 12 | Dialysis              |                      |                                                                                                                             |                                                                                                                                                                                   |                                    |
|                   |                                                                                            |               |                 | 11.9 (3.70)              | 12 | Control group         |                      |                                                                                                                             |                                                                                                                                                                                   |                                    |
| 2                 | Bawden 2004                                                                                | Canada        | Cross-sectional | 11.8 (3.27)              | 22 | CKD I-V               | Intelligence         | WISC-III                                                                                                                    | Full-Scale IQ<br>Verbal IQ<br>Performance IQ<br>Reading<br>Writing<br>Arithmetic<br>Word Attack<br>Reading Comprehension                                                          | N/A                                |
|                   |                                                                                            |               |                 | 11.7 (3.09)              | 22 | Control group         | Academic achievement | WIAT, WRAT3, Woodcock Reading Mastery Test-R                                                                                |                                                                                                                                                                                   |                                    |
|                   |                                                                                            |               |                 |                          |    |                       | Language             | Expressive One-Word Picture Vocabulary Test                                                                                 |                                                                                                                                                                                   |                                    |
|                   |                                                                                            |               |                 |                          |    |                       | Memory               | WRAML, Nonverbal Selective Reminding Test                                                                                   |                                                                                                                                                                                   |                                    |
| Visuomotor skills | Developmental Test of Visual-Motor Integration, Grooved Pegboard Test, Finger-Tapping Test |               |                 |                          |    |                       |                      |                                                                                                                             |                                                                                                                                                                                   |                                    |
| 3                 | Brouhard 2000                                                                              | United States | Cross-sectional | 13.7 (0.44)              | 26 | Dialysis              | Intelligence         | Test of Nonverbal Intelligence-2                                                                                            | Reading<br>Spelling<br>Arithmetic                                                                                                                                                 | N/A                                |
|                   |                                                                                            |               |                 | 13.7 (0.38)              | 36 | Transplant recipients | Academic achievement | WRAT                                                                                                                        |                                                                                                                                                                                   |                                    |
|                   |                                                                                            |               |                 |                          | 62 | Control group         |                      |                                                                                                                             |                                                                                                                                                                                   |                                    |
| 4                 | Crittenden 1985                                                                            | United States | Cohort          | R: 0.50-16               | 66 | CKD I-V               | Intelligence         | WISC, WISC-R, WAIS, Stanford-Binet Intelligence Test, Cattell Infant Intelligence Test, Bayley Scales of Infant Development | Full-Scale IQ                                                                                                                                                                     | Median: 14 months (R: 2-40 months) |
| 5                 | Crocker 2002                                                                               | Canada        | Cross-sectional | 12.0 (2.41)              | 24 | CKD I-V               | Intelligence         | WISC-III                                                                                                                    | Full-Scale IQ<br>Verbal IQ<br>Performance IQ<br>Reading<br>Spelling<br>Arithmetic<br>Word Attack<br>Reading Comprehension<br>Verbal Learning<br>Sentence Memory<br>Finger Windows | N/A                                |
|                   |                                                                                            |               |                 |                          |    |                       | Academic achievement | WIAT, WRAT3, Woodcock Reading Mastery-R                                                                                     |                                                                                                                                                                                   |                                    |
|                   |                                                                                            |               |                 |                          |    |                       | Language             | Expressive One-Word Picture Vocabulary Test                                                                                 |                                                                                                                                                                                   |                                    |
|                   |                                                                                            |               |                 |                          |    |                       | Memory               | WRAML, Nonverbal Selective Reminding Test                                                                                   |                                                                                                                                                                                   |                                    |
|                   |                                                                                            |               |                 |                          |    |                       | Visuomotor skills    | Developmental Test of Visual-Motor Integration, Grooved Pegboard Test, Finger-Tapping Test                                  |                                                                                                                                                                                   |                                    |

Supplemental material is neither peer-reviewed nor thoroughly edited by CJASN. The authors alone are responsible for the accuracy and presentation of the material.

|    |                |               |                 |                             |    |                                  |                      |                                                                                                                                                                        |                                                                                                                                                                                                     |                     |
|----|----------------|---------------|-----------------|-----------------------------|----|----------------------------------|----------------------|------------------------------------------------------------------------------------------------------------------------------------------------------------------------|-----------------------------------------------------------------------------------------------------------------------------------------------------------------------------------------------------|---------------------|
| 6  | Duquette 2008  | United States | Cross-sectional | 12.7 (3.32)                 | 30 | CKD I-V                          | Attention            | Tower of London Test<br>Gordon Diagnostic System<br>Keith Auditory Continuous Performance Test<br>Ruff Figural Fluency Test<br><i>WRAML/WASI scores as co-variates</i> | Total Move<br>Total Execution Time<br>Total Correct<br>Mean Response Time<br>Correct Variability<br>Total Correct<br>Correct Variability<br>Perseverations Total<br>Finger Windows<br>Number/Letter | N/A                 |
|    |                |               |                 | 11.7 (3.36)                 | 41 | Control group                    |                      |                                                                                                                                                                        |                                                                                                                                                                                                     |                     |
| 7  | Duquette 2007  | United States | Cross-sectional | 12.7 (3.32)                 | 30 | CKD I-V                          | Intelligence         | WASI                                                                                                                                                                   | Full-Scale IQ<br>Verbal IQ<br>Performance IQ<br>Word Reading<br>Mathematics Reasoning<br>Spelling                                                                                                   | N/A                 |
|    |                |               |                 | 11.7 (3.36)                 | 41 | Control group                    | Academic achievement | WIAT-II                                                                                                                                                                |                                                                                                                                                                                                     |                     |
| 8  | El-Shazly 2010 | Egypt         | Cross-sectional | -                           | 25 | CKD I-V                          | Intelligence         | Stanford-Binet Intelligence Test                                                                                                                                       | Full-Scale IQ                                                                                                                                                                                       | N/A                 |
|    |                |               |                 | -                           | 25 | Control group                    |                      |                                                                                                                                                                        |                                                                                                                                                                                                     |                     |
| 9  | Falger 2008    | Switzerland   | Cross-sectional | Median: 14.1 (R: 6.50-17.0) | 27 | Transplant recipients            | Intelligence         | WISC-III or Kaufman Assessment Battery for Children                                                                                                                    | Full-Scale IQ<br>Verbal IQ<br>Performance IQ                                                                                                                                                        | N/A                 |
| 10 | Fennell 1990   | United States | Cohort          | 13.6 (no SD)                | 56 | CKD I-V                          | Intelligence         | WISC-R, WAIS-R                                                                                                                                                         | Verbal IQ<br>Digit Span<br>Color Progressive<br>Standard Progressive                                                                                                                                | 6, 12, and 18months |
|    |                |               |                 |                             |    |                                  | Attention            | Continuous Performance Task                                                                                                                                            |                                                                                                                                                                                                     |                     |
|    |                |               |                 | -                           | 56 | Control group                    | Memory               | Buschke Restricted Reminding Memory, Auditory Consonant Trigrams, Distraction Paradigm                                                                                 |                                                                                                                                                                                                     |                     |
|    |                |               |                 |                             |    |                                  | Visuomotor skills    | Raven's Matrices, Beery-Butenica Development Test                                                                                                                      |                                                                                                                                                                                                     |                     |
| 11 | Fennell 1984   | United States | Cohort          | 11.7 (3.70)                 | 20 | CKD I-V-to-transplant recipients | Intelligence         | WISC                                                                                                                                                                   | Full-Scale IQ<br>Verbal IQ<br>Performance IQ<br>Digit Span                                                                                                                                          | 1 month;<br>1 year  |
|    |                |               |                 | 12.6 (3.90)                 | 18 | Control group                    | Academic achievement | Peabody Individual Achievement Test                                                                                                                                    |                                                                                                                                                                                                     |                     |
|    |                |               |                 |                             |    |                                  | Attention            | Continuous Performance Task                                                                                                                                            |                                                                                                                                                                                                     |                     |
|    |                |               |                 |                             |    |                                  | Executive function   | Halstead-Reitan Category Test                                                                                                                                          |                                                                                                                                                                                                     |                     |
|    |                |               |                 |                             |    |                                  | Memory               | Free recall memory task                                                                                                                                                |                                                                                                                                                                                                     |                     |

Supplemental material is neither peer-reviewed nor thoroughly edited by CJASN. The authors alone are responsible for the accuracy and presentation of the material.

|    |                 |               |                 |             |    |                       |                                                                                |                          |                                                                                                                                                                                                                                                                                             |     |
|----|-----------------|---------------|-----------------|-------------|----|-----------------------|--------------------------------------------------------------------------------|--------------------------|---------------------------------------------------------------------------------------------------------------------------------------------------------------------------------------------------------------------------------------------------------------------------------------------|-----|
| 12 | Gipson 2006     | United States | Cross-sectional | 13.4 (3.20) | 20 | CKD I-V               | Intelligence                                                                   | WASI                     | Numbers Reversed<br>Vigilance subtest                                                                                                                                                                                                                                                       | N/A |
|    |                 |               |                 | 12.9 (2.90) | 18 | Control group         | Executive function                                                             |                          |                                                                                                                                                                                                                                                                                             |     |
| 13 | Gulleroglu 2013 | Turkey        | Cross-sectional | 12.6 (3.20) | 20 | CKD I-V               | Attention                                                                      | Cancellation Test        |                                                                                                                                                                                                                                                                                             | N/A |
|    |                 |               |                 | 13.5 (3.40) | 20 | Transplant recipients | Language                                                                       |                          |                                                                                                                                                                                                                                                                                             |     |
|    |                 |               |                 | 14.2 (2.10) | 20 | Control group         | Visuomotor skills                                                              |                          |                                                                                                                                                                                                                                                                                             |     |
| 14 | Haavisto 2012   | Finland       | Cross-sectional | 11.1 (3.20) | 50 | Transplant recipients | Intelligence                                                                   | WISC-III<br><br>NEPSY-II | Full-Scale IQ<br>Verbal IQ<br>Performance IQ<br>Auditory Attention and Response Set<br>Speeded Naming<br>Comprehension of Instru.<br>Visuomotor Precision<br>Memory for Designs<br>Memory for Faces<br>World List Interference<br>Design Copying<br>Geometric Puzzles<br>Affect Recognition | N/A |
|    |                 |               |                 |             |    |                       | Attention<br>Language<br>Memory<br>Visuomotor skills                           |                          |                                                                                                                                                                                                                                                                                             |     |
| 15 | Hartmann 2015   | Germany       | Cross-sectional | 8.30 (1.40) | 15 | Transplant recipients | Intelligence                                                                   | HAWIK-III, CFIT          | Full-Scale IQ<br>Verbal IQ<br>Performance IQ<br>CFT 1 sum 1<br>CFT 1 sum 2<br>CFT 1 sum 3<br>CFT 20-R                                                                                                                                                                                       | N/A |
| 16 | Hartung 2016    | United States | Cross-sectional | 16.3 (3.90) | 92 | CKD I-V               | Executive function<br>Episodic memory<br>Complex cognition<br>Social cognition | Penn CNB                 | Conditional Exclusion<br>Continuous Performance<br>Short Letter N-Back<br>Word Memory<br>Face Memory                                                                                                                                                                                        | N/A |

Supplemental material is neither peer-reviewed nor thoroughly edited by CJASN. The authors alone are responsible for the accuracy and presentation of the material.

|    |                        |                 |                 |                                       |     |                        |                                                                                     |                                                                                                                                |                                                                                                                                                                |          |
|----|------------------------|-----------------|-----------------|---------------------------------------|-----|------------------------|-------------------------------------------------------------------------------------|--------------------------------------------------------------------------------------------------------------------------------|----------------------------------------------------------------------------------------------------------------------------------------------------------------|----------|
|    |                        |                 |                 | 16.0 (4.00)                           | 69  | Control group          |                                                                                     |                                                                                                                                | Visual Object Learning<br>Verbal Reasoning<br>Matrix Reasoning<br>Line Orientation<br>Emotion Identification<br>Emotion Differentiation<br>Age Differentiation |          |
| 17 | Hartung 2014           | United States   | Cross-sectional | Median: 7.60                          | 66  | CKD I-V                | Intelligence<br><br>Academic achievement<br><br>Attention<br><br>Executive function | WASI or WPPSI-R or Mullen Scales of Early Learning<br><br>WIAT-II-A<br><br>Conners' CPT-II<br>Conners' Kiddie CPT<br><br>BRIEF | Full-Scale IQ<br>Verbal IQ<br>Performance IQ<br>Numerical operations<br>Word reading<br>Spelling<br>Total achievement                                          | N/A      |
| 18 | Hooper 2015            | United States   | Cross-sectional | 16.2 (3.87)                           | 90  | CKD I-V                | Executive function                                                                  | BRIEF (Parent-Report and Adult versions)                                                                                       | Behavior regulation index<br>Metacognition index<br>Global executive composite                                                                                 | N/A      |
|    |                        |                 |                 | 16.0 (3.96)                           | 69  | Control group          |                                                                                     |                                                                                                                                |                                                                                                                                                                |          |
| 19 | Hooper 2011            | United States   | Cross-sectional | Median 13.0 (IQR, 15.0; R: 6.00-17.0) | 368 | CKD I-V                | Intelligence<br><br>Academic achievement<br><br>Attention<br><br>Executive function | WASI<br><br>WIAT-II-A<br><br>Conners' CPT-II<br><br>BRIEF (Parent-Report)                                                      | Full-Scale IQ<br>Verbal IQ<br>Performance IQ<br>Basic reading<br>Spelling<br>Numerical operations<br>Total achievement                                         | N/A      |
| 20 | Hulstijn-Dirkmaat 1995 | The Netherlands | Cohort          | 2.43 (1.58)                           | 15  | CKD I-V                | Cognitive development                                                               | Bayley Developmental Scales <2.6y OR<br>McCarthy Developmental Scales >2.6y                                                    |                                                                                                                                                                | 6 months |
|    |                        |                 |                 | 2.58 (1.48)                           | 16  | Dialysis               |                                                                                     |                                                                                                                                |                                                                                                                                                                |          |
| 21 | Hulstijn-Dirkmaat 1992 | The Netherlands | Cross-sectional | 3.08 (R: 1.75-2.92)                   | 18  | CKD I-V                | Cognitive development                                                               | Bayley Developmental Scales <2.6y OR<br>McCarthy Developmental Scales >2.6y                                                    |                                                                                                                                                                | N/A      |
|    |                        |                 |                 | 2.92 (R: 2.25-3.75)                   | 18  | Control group          |                                                                                     |                                                                                                                                |                                                                                                                                                                |          |
| 22 | Icard 2010             | United States   | Cohort          | 7.80 (no SD)                          | 28  | CKD I-V                | Intelligence                                                                        | Mullen Scales of Early Learning <5y OR<br>WASI 6-18y                                                                           | Full-Scale IQ                                                                                                                                                  | 1 year   |
|    |                        |                 |                 | 10.7 (no SD)                          | 6   | Transplants recipients |                                                                                     |                                                                                                                                |                                                                                                                                                                |          |
|    |                        |                 |                 | 10.3 (no SD)                          | 23  | Control group          |                                                                                     |                                                                                                                                |                                                                                                                                                                |          |
| 23 | Johnson 2013           | United States   | Cross-          | 11.0 (no SD)                          | 12  | Transplant recipients  | Intelligence                                                                        | WISC-IV                                                                                                                        | Full-Scale IQ                                                                                                                                                  | N/A      |

Supplemental material is neither peer-reviewed nor thoroughly edited by CJASN. The authors alone are responsible for the accuracy and presentation of the material.

|    |                   |                 |                 |                       |     |                                  |                                                      |                                                                                           |                                                                                                                                                             |                            |
|----|-------------------|-----------------|-----------------|-----------------------|-----|----------------------------------|------------------------------------------------------|-------------------------------------------------------------------------------------------|-------------------------------------------------------------------------------------------------------------------------------------------------------------|----------------------------|
|    |                   |                 | sectional       | 10.0 (no SD)          | 9   | Control group                    | Academic achievement<br>Executive function<br>Memory | WIAT-II-A<br>BRIEF (Parent-Report)<br>WRAML2                                              | Verbal comprehension<br>Perceptual reasoning<br>Working memory<br>Processing speed<br>Word reading<br>Numerical operations<br>Spelling<br>Total achievement |                            |
| 24 | Kuyer 1990        | The Netherlands | Cohort          | 9.50 (R: 4-14)        | 20  | CKD I-V-to-transplant recipients | Intelligence                                         | WISC-R or WPPSI-R                                                                         | Full-Scale IQ<br>Verbal IQ<br>Performance IQ                                                                                                                | Mean 1.7y (R: 5-47 months) |
| 25 | Lawry 1994        | United States   | Cross-sectional | 14.9 (3.33)           | 11  | Dialysis                         | Intelligence                                         | WISC-R or WAIS-R                                                                          | Full-Scale IQ<br>Verbal IQ                                                                                                                                  | N/A                        |
|    |                   |                 |                 | 13.9 (3.22)           | 13  | Transplant recipients            | Academic achievement                                 | Woodcock-Johnson Test                                                                     | Performance IQ<br>Mathematics<br>Reading<br>Written language                                                                                                |                            |
| 26 | Madden 2003       | United Kingdom  | Cross-sectional | 5.84 (2.96)           | 16  | Dialysis/transplant recipients   | Intelligence                                         | WISC-III, Griffiths Mental Development Scales                                             | Full-Scale IQ                                                                                                                                               | N/A                        |
| 27 | Mendley 2015      | United States   | Cross-sectional | Median: 13.0 (IQR: 7) | 340 | CKD I-V                          | Intelligence                                         | WISC                                                                                      | Tower Task                                                                                                                                                  | N/A                        |
|    |                   |                 |                 |                       |     |                                  | Attention                                            | Conners' CPT-II                                                                           | Digit Span Backward                                                                                                                                         |                            |
|    |                   |                 |                 |                       |     |                                  | Executive function                                   | D-KEFS                                                                                    |                                                                                                                                                             |                            |
| 28 | Mendley 1999      | United States   | Cohort          | 14.2 (3.50)           | 9   | CKD I-V-to-transplant recipients | Intelligence                                         | WISC-III or WAIS-R                                                                        | Full-Scale IQ                                                                                                                                               | 1 year                     |
|    |                   |                 |                 |                       |     |                                  | Attention                                            | Conners' CPT, Stroop Color-Word Naming Test, Cognitive Abilities Test                     | Verbal IQ                                                                                                                                                   |                            |
|    |                   |                 |                 |                       |     |                                  | Executive function                                   | Paced Auditory Serial Addition Test OR the Children's Paced Auditory Serial Addition Test | Performance IQ                                                                                                                                              |                            |
|    |                   |                 |                 |                       |     |                                  | Language                                             | Buschke Selective Reminding Test                                                          |                                                                                                                                                             |                            |
|    |                   |                 |                 |                       |     |                                  | Visuomotor skills                                    | Meier Visual Discrimination Test, Trail-making Test, Grooved Pegboard Test                |                                                                                                                                                             |                            |
| 29 | Molnar-Varga 2016 | Hungary         | Cross-sectional | 13.4 (2.40)           | 35  | Transplant recipients            | Intelligence                                         | Woodcock-Johnson International Edition                                                    | Full-Scale IQ                                                                                                                                               | N/A                        |
|    |                   |                 |                 | 13.4 (2.50)           | 35  | Control group                    |                                                      |                                                                                           | Verbal Ability<br>Thinking Ability<br>Cognitive Efficiency                                                                                                  |                            |
| 30 | Qvist 2002        | Finland         | Cross-          | 8.00 (R: 7-12)        | 33  | Transplant recipients            | Intelligence                                         | WISC-R                                                                                    | Full-Scale IQ                                                                                                                                               | N/A                        |



Supplemental material is neither peer-reviewed nor thoroughly edited by CJASN. The authors alone are responsible for the accuracy and presentation of the material.

|    |               |               | sectional       |             |    |                                  | Attention<br>Language<br>Memory<br>Visuomotor skills | NEPSY                                         | Verbal IQ<br>Performance IQ                                                                                                                                                                              |         |
|----|---------------|---------------|-----------------|-------------|----|----------------------------------|------------------------------------------------------|-----------------------------------------------|----------------------------------------------------------------------------------------------------------------------------------------------------------------------------------------------------------|---------|
| 31 | Rasbury 1986  | United States | Cohort          | 12.8 (3.61) | 18 | CKD I-V –to-dialysis             | Intelligence                                         | CFIT                                          |                                                                                                                                                                                                          | 4 days  |
|    |               |               |                 | 13.1 (3.56) | 18 | Control group                    | Memory                                               | Paired associate learning test                |                                                                                                                                                                                                          |         |
| 32 | Rasbury 1983  | United States | Cohort          | 11.2 (3.40) | 14 | CKD I-V-to-transplant recipients | Intelligence                                         | WISC                                          | Full-Scale IQ<br>Verbal IQ<br>Performance IQ<br>Mathematics<br>Reading<br>Information                                                                                                                    | 1 month |
|    |               |               |                 | 11.0 (3.60) | 14 | Control group                    | Academic achievement                                 | Peabody Individual Achievement Test           |                                                                                                                                                                                                          |         |
|    |               |               |                 |             |    |                                  | Attention                                            | Continuous Performance Task                   |                                                                                                                                                                                                          |         |
|    |               |               |                 |             |    |                                  | Executive function                                   | Halstead-Reitan Category Test                 |                                                                                                                                                                                                          |         |
|    |               |               |                 |             |    | Memory                           | Free Recall Memory Task                              |                                               |                                                                                                                                                                                                          |         |
| 33 | Ruebner 2016  | United States | Cross-sectional | 16.3 (3.94) | 92 | CKD I-V                          | Attention                                            | WISC-IV-I, Conners CPT-II                     | Vocabulary<br>Similarities<br>Matrix Reasoning<br>Block Design<br>Total Achievement<br>Move Accuracy Ratio<br>Digit Span Forward<br>Digit Span Backward<br>Spatial Span Forward<br>Spatial Span Backward | N/A     |
|    |               |               |                 | 15.9 (3.93) | 70 | Control group                    | Executive function                                   | BRIEF (Parent Report, Adult versions), D-KEFS |                                                                                                                                                                                                          |         |
|    |               |               |                 |             |    | Language                         | WASI                                                 |                                               |                                                                                                                                                                                                          |         |
|    |               |               |                 |             |    | Memory                           | WISC-IV-I, WMS-III                                   |                                               |                                                                                                                                                                                                          |         |
|    |               |               |                 |             |    | Visuomotor skills                | WASI, WMS-III                                        |                                               |                                                                                                                                                                                                          |         |
| 34 | Slickers 2007 | United States | Cross-sectional | 12.5 (3.20) | 29 | CKD I-V                          | Intelligence                                         | WASI                                          | Vocabulary<br>Block design<br>Similarities<br>Matrix reasoning                                                                                                                                           | N/A     |
|    |               |               |                 |             |    | Attention                        | Gordon Diagnostic System                             |                                               |                                                                                                                                                                                                          |         |
|    |               |               |                 |             |    | Memory                           | WRAML                                                |                                               |                                                                                                                                                                                                          |         |

*Supplemental material is neither peer-reviewed nor thoroughly edited by CJASN. The authors alone are responsible for the accuracy and presentation of the material.*

## **Legend**

BRIEF: Behavior Rating Inventory of Executive Function

CFIT: Culture Fair Intelligence Test

CKD: chronic kidney disease

Conners CPT-II: Conners Continuous Performance Test, Second Edition

Conners Kiddie CPT: Conners Kiddie Continuous Performance Test

D-KEFS: Delis-Kaplan Executive Function System

HAWIK-III: Hamburg-Wechsler-Intelligenztests für Kinder (Hamburg-Wechsler-Intelligence Scale for Children), Third Edition

NEPSY: Developmental Neuropsychological Assessment

NEPSY-II: Developmental Neuropsychological Assessment, Second Assessment

Penn CNB: Penn's Computerized Neurocognitive Battery

WAIS-R: Wechsler Adult Intelligence Scale - Revised

WASI: Wechsler Abbreviated Scale of Intelligence

WIAT: Wechsler Individual Achievement Test

WIAT-II-A: Wechsler Individual Achievement Test-II Abbreviated

WISC: Wechsler Intelligence Scale for Children

WISC-R: Wechsler Intelligence Scale for Children - Revised

WISC-III: Wechsler Intelligence Scale for Children, Third Edition

WISC-IV: Wechsler Intelligence Scale for Children, Fourth Edition

WMS-III: Wechsler Memory Scale, Third Edition

WPPSI-III: Wechsler Preschool and Primary Scale of Intelligence, Third Edition

WRAML: Wide Range Assessment of Memory and Learning

WRAML2: Wide Range Assessment of Memory and Learning, Second Edition

WRAT: Wide Range Achievement Test

WRAT3: Wide Range Achievement Test-Revised, Third Edition

Supplemental material is neither peer-reviewed nor thoroughly edited by CJASN. The authors alone are responsible for the accuracy and presentation of the material.

**Supplementary Table 3 – Clinical outcomes**

| <b>TABLE 2.1 Clinical outcomes – comparison with healthy controls</b> |                            |                    |                |                  |                     |                      |                                 |                                |          |                          |
|-----------------------------------------------------------------------|----------------------------|--------------------|----------------|------------------|---------------------|----------------------|---------------------------------|--------------------------------|----------|--------------------------|
| <b>Outcome</b>                                                        | <b>Domains</b>             | <b>n (studies)</b> | <b>N (CKD)</b> | <b>Mean (SD)</b> | <b>N (controls)</b> | <b>Mean (SD)</b>     | <b>Mean difference [95% CI]</b> | <b>Effect size (Cohen’s d)</b> | <b>P</b> | <b>I<sup>2</sup> (%)</b> |
| <b>MILD-TO-MODERATE STAGE CKD</b>                                     |                            |                    |                |                  |                     |                      |                                 |                                |          |                          |
| Intelligence*                                                         | Full-Scale IQ              |                    |                |                  |                     |                      |                                 |                                |          |                          |
|                                                                       | - Healthy controls         | 6                  | 132            | 89.3 (15.3)      | 134                 | 106 (13.6)           | -16.2 [-22.2, -10.1]            | 1.15                           | <0.001   | 81                       |
|                                                                       | - Normative data           | 11                 | 582            | 94.2 (16.1)      | -                   | 100 (15)             | -9.39 [-12.6, -6.18]            | 0.63                           | <0.001   | 87                       |
|                                                                       | Verbal IQ                  |                    |                |                  |                     |                      |                                 |                                |          |                          |
|                                                                       | - Healthy controls         | 4                  | 84             | 91.6 (16.2)      | 93                  | 102 (13.4)           | -7.84 [-13.5, -2.20]            | 0.70                           | 0.006    | 61                       |
|                                                                       | - Normative data           | 8                  | 505            | 96.2 (16.7)      | -                   | 100 (15)             | -8.07 [-12.2, -3.90]            | 0.54                           | <0.001   | 90                       |
|                                                                       | Performance IQ             |                    |                |                  |                     |                      |                                 |                                |          |                          |
|                                                                       | - Healthy controls         | 4                  | 84             | 88.7 (14.3)      | 93                  | 101 (12.4)           | -11.7 [-13.2, -10.2]            | 0.92                           | <0.001   | 0                        |
| - Normative data                                                      | 8                          | 505                | 94.3 (15.9)    | -                | 100 (15)            | -8.73 [-12.8, -4.69] | 0.58                            | <0.001                         | 91       |                          |
| CFIT                                                                  |                            |                    |                |                  |                     |                      |                                 |                                |          |                          |
|                                                                       | CFIT                       | 1                  | 18             | 13.6 (2.78)      | 18                  | 14.8 (2.64)          | -1.20 [-2.97, 0.57]             | 0.44                           | 0.18     | -                        |
| Academic achievement                                                  | Single Word Reading        |                    |                |                  |                     |                      |                                 |                                |          |                          |
|                                                                       | - Healthy controls         | 2                  | 52             | 96.9 (15.0)      | 63                  | 100 (14.8)           | -0.60 [-8.44, 7.24]             | 0.21                           | 0.88     | 71                       |
|                                                                       | - Normative data           | 4                  | 444            | 96.0 (16.8)      | -                   | 100 (15)             | -6.38 [-11.6, -1.17]            | 0.43                           | 0.02     | 94                       |
|                                                                       | Reading Comprehension      |                    |                |                  |                     |                      |                                 |                                |          |                          |
|                                                                       | - Healthy controls         | 1                  | 22             | 98.5 (2.60)      | 22                  | 98.1 (3.50)          | 0.40 [-1.42, 2.22]              | 0.13                           | 0.67     | -                        |
|                                                                       | - Normative data           | 2                  | 46             | 98.6 (11.4)      | -                   | 100 (15)             | -1.50 [-2.57, -0.43]            | 0.10                           | 0.006    | 0                        |
|                                                                       | Mathematics                |                    |                |                  |                     |                      |                                 |                                |          |                          |
|                                                                       | - Healthy controls         | 2                  | 52             | 92.8 (19.1)      | 63                  | 105 (18.5)           | -7.25 [-8.89, -5.62]            | 0.65                           | <0.001   | 24                       |
|                                                                       | - Normative data           | 4                  | 444            | 93.2 (14.5)      | -                   | 100 (15)             | -9.58 [-16.0, -3.12]            | 0.64                           | 0.004    | 95                       |
|                                                                       | Spelling                   |                    |                |                  |                     |                      |                                 |                                |          |                          |
|                                                                       | - Healthy controls         | 2                  | 52             | 98.7 (16.1)      | 63                  | 97.1 (15.6)          | 4.76 [-0.52, 10.0]              | 0.10                           | 0.08     | 44                       |
|                                                                       | - Normative data           | 4                  | 444            | 96.1 (17.5)      | -                   | 100 (15)             | -5.18 [-8.27, -2.09]            | 0.35                           | 0.001    | 80                       |
|                                                                       | WIAT scores                |                    |                |                  |                     |                      |                                 |                                |          |                          |
|                                                                       | - <b>Total Achievement</b> |                    |                |                  |                     |                      |                                 |                                |          |                          |
|                                                                       | Healthy controls           | 0                  | 0              | -                | 0                   | -                    | -                               | -                              | -        | -                        |
|                                                                       | Normative data             | 1                  | 368            | 95.2 (17.8)      | -                   | 100 (15)             | -4.80 [-6.62, -2.98]            | 0.32                           | <0.001   | -                        |
|                                                                       | WRMT-R                     |                    |                |                  |                     |                      |                                 |                                |          |                          |
|                                                                       | - <b>Word Attack</b>       |                    |                |                  |                     |                      |                                 |                                |          |                          |
|                                                                       | Healthy controls           | 1                  | 22             | 93.0 (4.10)      | 22                  | 90.5 (3.20)          | 2.50 [0.33, 4.67]               | 0.68                           | 0.02     | -                        |
|                                                                       | Normative data             | 2                  | 46             | 91.9 (10.9)      | -                   | 100 (15)             | -7.16 [-8.81, -5.52]            | 0.48                           | <0.001   | 0                        |
| Peabody scores                                                        |                            |                    |                |                  |                     |                      |                                 |                                |          |                          |
| - Reading                                                             | 2                          | 34                 | 37.2 (14.6)    | 32               | 38.4 (11.8)         | -1.08 [-7.40, 5.23]  | 0.09                            | 0.84                           | 0        |                          |
| - Mathematics                                                         | 2                          | 34                 | 37.2 (14.2)    | 32               | 39.6 (16.3)         | -2.34 [-9.68, 4.99]  | 0.16                            | 0.63                           | 0        |                          |
| - General Information                                                 | 2                          | 34                 | 32.4 (19.6)    | 32               | 32.5 (16.0)         | -0.12 [-8.69, 8.45]  | 0.01                            | 0.98                           | 0        |                          |
| Attention                                                             | Conners’ CPT (T-scores)    |                    |                |                  |                     |                      |                                 |                                |          |                          |
|                                                                       | - Omissions                | 1                  | 368            | 51.7 (13.5)      | -                   | 50 (10)              | 1.70 [0.32, 3.08]               | 0.17                           | 0.02     | -                        |
|                                                                       | - Commissions              | 1                  | 368            | 51.7 (11.0)      | -                   | 50 (10)              | 1.70 [0.58, 2.82]               | 0.17                           | 0.003    | -                        |

Supplemental material is neither peer-reviewed nor thoroughly edited by CJASN. The authors alone are responsible for the accuracy and presentation of the material.

|                                |                                                   |   |     |             |    |             |                      |      |        |   |
|--------------------------------|---------------------------------------------------|---|-----|-------------|----|-------------|----------------------|------|--------|---|
|                                | - Variability                                     | 1 | 368 | 50.1 (11.0) | -  | 50 (10)     | 0.10 [-1.02, 1.22]   | 0.01 | 0.86   | - |
|                                | - Reaction Time                                   | 1 | 368 | 48.2 (11.9) | -  | 50 (10)     | -1.80 [-3.02, -0.58] | 0.18 | 0.004  | - |
|                                | CPT (#/20)                                        | 1 | 20  | 14.8 (4.50) | 18 | 14.7 (4.60) | 0.10 [-2.80, 3.00]   | 0.02 | 0.95   | - |
|                                | GDS Vigilance                                     | 1 | 29  | 96.0 (23.0) | -  | 100 (15)    | -4.00 [-12.4, 4.37]  | 0.27 | -0.35  | - |
| Attention domains <sup>a</sup> | Focus/Execute                                     |   |     |             |    |             |                      |      |        |   |
|                                | - Healthy controls                                | 1 | 30  | 94.7 (11.4) | 41 | 99.7 (8.51) | -5.06 [-9.91, -0.21] | 0.50 | 0.04   | - |
|                                | - Normative data                                  | 1 | 30  | 94.7 (11.4) | -  | 100 (15)    | -5.30 [-9.38, -1.22] | 0.35 | 0.01   | - |
|                                | Sustain                                           |   |     |             |    |             |                      |      |        |   |
|                                | - Healthy controls                                | 1 | 30  | 94.4 (16.2) | 41 | 103 (14.8)  | -8.93 [-16.3, -1.56] | 0.55 | 0.02   | - |
|                                | - Normative data                                  | 1 | 30  | 94.4 (16.2) | -  | 100 (15)    | -5.60 [-11.4, 0.20]  | 0.37 | 0.06   | - |
|                                | Stability                                         |   |     |             |    |             |                      |      |        |   |
|                                | - Healthy controls                                | 1 | 30  | 87.2 (18.3) | 41 | 97.0 (16.3) | -9.75 [-18.0, -1.52] | 0.57 | 0.02   | - |
|                                | - Normative data                                  | 1 | 30  | 87.2 (18.3) | -  | 100 (15)    | -12.8 [-19.4, -6.25] | 0.85 | <0.001 | - |
|                                | Shift                                             |   |     |             |    |             |                      |      |        |   |
|                                | - Healthy controls                                | 1 | 30  | 91.5 (11.0) | 41 | 95.7 (11.9) | -4.24 [-9.60, 1.12]  | 0.37 | 0.12   | - |
|                                | - Normative data                                  | 1 | 30  | 91.5 (11.0) | -  | 100 (15)    | -8.50 [-12.4, -4.56] | 0.57 | <0.001 | - |
|                                | Encode                                            |   |     |             |    |             |                      |      |        |   |
|                                | - Healthy controls                                | 1 | 30  | 88.7 (9.38) | 41 | 99.5 (10.1) | -10.8 [-15.4, -6.23] | 1.11 | <0.001 | - |
|                                | - Normative data                                  | 1 | 30  | 88.7 (9.38) | -  | 100 (15)    | -11.3 [-14.7, -7.94] | 0.75 | <0.001 | - |
| Cognitive development          | Bayley/McCarthy Developmental Scales <sup>b</sup> | 1 | 15  | 90.3 (14.3) | -  | 100 (16)    | -9.70 [-16.9, -2.46] | 0.61 | 0.009  | - |
| Executive function             | BRIEF (T-scores)                                  |   |     |             |    |             |                      |      |        |   |
|                                | - <b>Behavior Regulation</b>                      |   |     |             |    |             |                      |      |        |   |
|                                | Healthy controls                                  | 1 | 65  | 54.3 (11.9) | 50 | 51.4 (12.8) | 2.88 [-1.69, 7.45]   | 0.23 | 0.22   | - |
|                                | Normative data                                    | 1 | 368 | 53.5 (11.1) | -  | 50 (10)     | 3.50 [1.97, 5.03]    | 0.35 | <0.001 | - |
|                                | - <b>Metacognition</b>                            |   |     |             |    |             |                      |      |        |   |
|                                | Healthy controls                                  | 1 | 65  | 60.3 (12.0) | 50 | 51.5 (11.2) | 8.80 [4.54, 13.1]    | 0.76 | <0.001 | - |
|                                | Normative data                                    | 1 | 368 | 55.9 (11.5) | -  | 50 (10)     | 5.90 [4.34, 7.46]    | 0.59 | <0.001 | - |
|                                | - <b>Global Executive</b>                         |   |     |             |    |             |                      |      |        |   |
|                                | Healthy controls                                  | 1 | 65  | 58.7 (11.5) | 50 | 51.5 (12.0) | 7.21 [2.87, 11.6]    | 0.61 | 0.001  | - |
|                                | Normative data                                    | 1 | 368 | 55.2 (11.6) | -  | 50 (10)     | 5.20 [3.64, 6.76]    | 0.52 | <0.001 | - |
|                                | HRPS Category Test                                | 1 | 20  | 47.7 (21.1) | 18 | 41.6 (23.0) | 6.10 [-7.99, 20.2]   | 0.28 | 0.40   | - |
|                                | Initiation                                        |   |     |             |    |             |                      |      |        |   |
|                                | - Healthy controls                                | 1 | 20  | 77.6 (19.2) | 18 | 106 (14.5)  | -28.4 [-39.2, -17.7] | 1.67 | <0.001 | - |
|                                | - Normative data                                  | 1 | 20  | 77.6 (19.2) | -  | 100 (15)    | -22.4 [-30.8, -14.0] | 1.49 | <0.001 | - |
|                                | Sustaining                                        |   |     |             |    |             |                      |      |        |   |
|                                | - Healthy controls                                | 1 | 20  | 85.0 (16.5) | 18 | 101 (19.3)  | -15.6 [-27.0, -4.10] | 0.89 | 0.008  | - |
|                                | - Normative data                                  | 1 | 20  | 85.0 (16.5) | -  | 100 (15)    | -15.1 [-22.3, -7.83] | 1.01 | <0.001 | - |
|                                | Set-Shifting                                      |   |     |             |    |             |                      |      |        |   |
|                                | - Healthy controls                                | 1 | 20  | 96.6 (17.3) | 18 | 96.2 (13.5) | 0.68 [-11.0, 12.4]   | 0.03 | 0.91   | - |
|                                | - Normative data                                  | 1 | 20  | 96.6 (17.3) | -  | 100 (15)    | -3.44 [-11.0, 4.15]  | 0.23 | 0.37   | - |
|                                | Inhibition                                        |   |     |             |    |             |                      |      |        |   |

Supplemental material is neither peer-reviewed nor thoroughly edited by CJASN. The authors alone are responsible for the accuracy and presentation of the material.

|          |                               |   |    |              |    |              |                      |      |        |    |
|----------|-------------------------------|---|----|--------------|----|--------------|----------------------|------|--------|----|
|          | - Healthy controls            | 1 | 20 | 95.9 (19.2)  | 18 | 97.6 (19.5)  | -1.76 [-14.1, 10.6]  | 0.04 | 0.78   | -  |
|          | - Normative data              | 1 | 20 | 95.9 (19.2)  | -  | 100 (15)     | -4.12 [-12.5, 4.29]  | 0.27 | 0.34   | -  |
| Language | EOWPVT <sup>c</sup>           | 1 | 24 | 97.9 (18.2)  | -  | 100 (15)     | -2.10 [-9.39, 5.18]  | 0.14 | 0.57   | -  |
| Memory   | WRAML scores                  |   |    |              |    |              |                      |      |        |    |
|          | - General Memory Index        | 1 | 29 | 88.0 (16.0)  | -  | 100 (15)     | -12.0 [-17.8, -6.18] | 0.80 | <0.001 | -  |
|          | <b>- Finger Windows</b>       |   |    |              |    |              |                      |      |        |    |
|          | Healthy controls              | 2 | 42 | 8.77 (2.09)  | 40 | 9.14 (1.72)  | -0.37 [-3.29, 2.55]  | 0.10 | 0.80   | 91 |
|          | Normative data                | 2 | 42 | 8.77 (2.09)  | -  | 10 (3)       | -1.01 [-1.76, -0.26] | 0.34 | 0.008  | 44 |
|          | <b>- Sentence Memory</b>      |   |    |              |    |              |                      |      |        |    |
|          | Healthy controls              | 2 | 42 | 7.91 (2.08)  | 40 | 10.1 (1.61)  | -2.21 [-5.02, 0.59]  | 0.51 | 0.12   | 91 |
|          | Normative data                | 2 | 42 | 7.91 (2.08)  | -  | 10 (3)       | -1.92 [-2.21, -1.63] | 0.64 | <0.001 | 0  |
|          | <b>- Verbal Learning</b>      |   |    |              |    |              |                      |      |        |    |
|          | Healthy controls              | 2 | 42 | 9.87 (2.03)  | 40 | 11.1 (1.59)  | -1.02 [-1.35, -0.69] | 0.32 | <0.001 | 0  |
|          | Normative data                | 2 | 42 | 9.87 (2.03)  | -  | 10 (3)       | 0.06 [-0.71, 0.84]   | 0.02 | -0.87  | 47 |
|          | <b>- Picture Memory</b>       |   |    |              |    |              |                      |      |        |    |
|          | Healthy controls              | 1 | 20 | 7.75 (2.99)  | 18 | 10.2 (2.81)  | -2.43 [-4.27, -0.59] | 0.39 | 0.010  | -  |
|          | Normative data                | 1 | 20 | 7.75 (2.99)  | -  | 10 (3)       | -2.25 [-3.56, -0.94] | 0.75 | <0.001 | -  |
|          | <b>- Design Memory</b>        |   |    |              |    |              |                      |      |        |    |
|          | Healthy controls              | 1 | 20 | 8.45 (1.91)  | 18 | 11.4 (3.02)  | -2.90 [-4.53, -1.27] | 0.50 | <0.001 | -  |
|          | Normative data                | 1 | 20 | 8.45 (1.91)  | -  | 10 (3)       | -1.55 [-2.39, -0.71] | 0.52 | <0.001 | -  |
|          | <b>- Story Memory</b>         |   |    |              |    |              |                      |      |        |    |
|          | Healthy controls              | 1 | 20 | 7.95 (2.91)  | 18 | 11.5 (2.53)  | -3.52 [-5.25, -1.79] | 0.55 | <0.001 | -  |
|          | Normative data                | 1 | 20 | 7.95 (2.91)  | -  | 10 (3)       | -2.05 [-3.33, -0.77] | 0.68 | 0.002  | -  |
|          | <b>- Sound Symbol</b>         |   |    |              |    |              |                      |      |        |    |
|          | Healthy controls              | 1 | 20 | 9.70 (3.05)  | 18 | 12.9 (2.05)  | -3.24 [-4.88, -1.60] | 0.52 | <0.001 | -  |
|          | Normative data                | 1 | 20 | 9.70 (3.05)  | -  | 10 (3)       | -0.30 [-1.64, 1.04]  | 0.10 | 0.66   | -  |
|          | <b>- Visual Learning</b>      |   |    |              |    |              |                      |      |        |    |
|          | Healthy controls              | 1 | 20 | 10.1 (2.25)  | 18 | 11.8 (2.97)  | -1.66 [-3.35, 0.03]  | 0.31 | 0.05   | -  |
|          | Normative data                | 1 | 20 | 10.1 (2.25)  | -  | 10 (3)       | 0.10 [-0.89, 1.09]   | 0.03 | 0.84   | -  |
|          | <b>- Number/Letter</b>        |   |    |              |    |              |                      |      |        |    |
|          | Healthy controls              | 1 | 20 | 7.15 (1.95)  | 18 | 10.0 (2.18)  | -2.85 [-4.17, -1.53] | 0.57 | <0.001 | -  |
|          | Normative data                | 1 | 20 | 7.15 (1.95)  | -  | 10 (3)       | -2.85 [-3.70, -2.00] | 0.95 | <0.001 | -  |
|          | NSRT (Z-scores)               |   |    |              |    |              |                      |      |        |    |
|          | <b>- Recall</b>               |   |    |              |    |              |                      |      |        |    |
|          | Healthy controls              | 1 | 22 | -0.80 (0.20) | 22 | -0.20 (0.20) | -0.60 [-0.72, -0.48] | 0.83 | <0.001 | -  |
|          | Normative data                | 1 | 22 | -0.80 (0.20) | -  | 0 (1)        | -0.80 [-0.88, -0.72] | 0.80 | <0.001 | -  |
|          | <b>- Long Term Storage</b>    |   |    |              |    |              |                      |      |        |    |
|          | Healthy controls              | 1 | 22 | -0.60 (0.20) | 22 | -0.10 (0.20) | -0.50 [-0.62, -0.38] | 0.78 | <0.001 | -  |
|          | Normative data                | 1 | 22 | -0.60 (0.20) | -  | 0 (1)        | -0.60 [-0.68, -0.52] | 0.60 | <0.001 | -  |
|          | <b>- Continuous Long Term</b> |   |    |              |    |              |                      |      |        |    |

Supplemental material is neither peer-reviewed nor thoroughly edited by CJASN. The authors alone are responsible for the accuracy and presentation of the material.

|                       |                                        |   |    |              |    |              |                      |      |        |    |
|-----------------------|----------------------------------------|---|----|--------------|----|--------------|----------------------|------|--------|----|
|                       | Healthy controls                       | 1 | 22 | -0.50 (0.20) | 22 | -0.20 (0.30) | -0.30 [-0.45, -0.15] | 0.51 | <0.001 | -  |
|                       | Normative data                         | 1 | 22 | -0.50 (0.20) | -  | 0 (1)        | -0.50 [-0.58, -0.42] | 0.50 | <0.001 | -  |
|                       | <b>WISC Digit Span</b>                 |   |    |              |    |              |                      |      |        |    |
|                       | - Healthy controls                     | 1 | 20 | 8.50 (2.70)  | 18 | 8.60 (3.00)  | -0.10 [-1.92, 1.72]  | 0.04 | 0.91   | -  |
|                       | - Normative data                       | 1 | 20 | 8.50 (2.70)  | -  | 10 (3)       | -1.50 [-2.68, -0.32] | 0.50 | 0.01   | -  |
|                       | FRM Total Score                        | 1 | 20 | 89.4 (23.4)  | 18 | 95.8 (27.1)  | -6.40 [-22.6, 9.78]  | 0.25 | 0.44   | -  |
|                       | FRM1 score                             | 1 | 20 | 5.00 (2.00)  | 18 | 5.20 (2.10)  | -0.20 [-1.51, 1.11]  | 0.10 | 0.76   | -  |
|                       | <b>Penn CNB<sup>d</sup> (Z-scores)</b> |   |    |              |    |              |                      |      |        |    |
| Executive control     | Abstraction                            | 1 | 92 | -            | 69 | -            | -0.20 [-0.51, 0.12]  | -    | 0.22   | -  |
|                       | Attention                              | 1 | 92 | -            | 69 | -            | -0.35 [-0.67, -0.03] | -    | 0.03   | -  |
|                       | Working memory                         | 1 | 92 | -            | 69 | -            | -0.19 [-0.61, 0.24]  | -    | 0.39   | -  |
| Episodic memory       | Verbal memory                          | 1 | 92 | -            | 69 | -            | -0.25 [-0.65, 0.15]  | -    | 0.23   | -  |
|                       | Facial memory                          | 1 | 92 | -            | 69 | -            | -0.32 [-0.68, 0.04]  | -    | 0.08   | -  |
|                       | Spatial memory                         | 1 | 92 | -            | 69 | -            | -0.35 [-0.72, 0.01]  | -    | 0.06   | -  |
| Complex cognition     | Verbal reasoning                       | 1 | 92 | -            | 69 | -            | -0.53 [-0.87, -0.19] | -    | 0.002  | -  |
|                       | Non-verbal reasoning                   | 1 | 92 | -            | 69 | -            | -0.52 [-0.83, -0.22] | -    | 0.001  | -  |
|                       | Spatial processing                     | 1 | 92 | -            | 69 | -            | -0.64 [-0.99, -0.29] | -    | <0.001 | -  |
| Social cognition      | Emotion identification                 | 1 | 92 | -            | 69 | -            | -0.28 [-0.64, 0.09]  | -    | 0.13   | -  |
|                       | Emotion differentiation                | 1 | 92 | -            | 69 | -            | -0.22 [-0.59, 0.14]  | -    | 0.23   | -  |
|                       | Age differentiation                    | 1 | 92 | -            | 69 | -            | -0.24 [-0.61, 0.14]  | -    | 0.21   | -  |
| <b>DIALYSIS</b>       |                                        |   |    |              |    |              |                      |      |        |    |
| Intelligence          | Full-Scale IQ                          |   |    |              |    |              |                      |      |        |    |
|                       | - Healthy controls                     | 1 | 12 | 75.5 (12.2)  | 12 | 105 (10.3)   | -29.5 [-38.5, -20.5] | 2.61 | <0.001 | -  |
|                       | - Normative data                       | 2 | 23 | 83.8 (14.6)  | -  | 100 (15)     | -16.2 [-33.2, 0.86]  | 1.08 | 0.06   | 87 |
|                       | Verbal IQ                              |   |    |              |    |              |                      |      |        |    |
|                       | - Healthy controls                     | 1 | 12 | 76.7 (6.50)  | 12 | 94.9 (6.00)  | -18.2 [-23.2, -13.2] | 1.52 | <0.001 | -  |
|                       | - Normative data                       | 2 | 23 | 83.9 (12.4)  | -  | 100 (15)     | -14.1 [-33.2, 4.89]  | 0.94 | 0.15   | 92 |
|                       | Performance IQ                         |   |    |              |    |              |                      |      |        |    |
|                       | - Healthy controls                     | 1 | 12 | 73.8 (10.1)  | 12 | 94.9 (10.1)  | -21.1 [-29.2, -13.0] | 2.09 | <0.001 | -  |
|                       | - Normative data                       | 2 | 23 | 84.4 (14.1)  | -  | 100 (15)     | -15.5 [-37.3, 6.21]  | 1.03 | 0.16   | 93 |
| Academic achievement  | WRAT scores                            |   |    |              |    |              |                      |      |        |    |
|                       | <b>- Reading</b>                       |   |    |              |    |              |                      |      |        |    |
|                       | Healthy controls                       | 1 | 26 | 90.0 (4.00)  | 26 | 100 (3.00)   | -10.0 [-11.9, -8.08] | 0.82 | <0.001 | -  |
|                       | Normative data                         | 1 | 26 | 90.0 (4.00)  | -  | 100 (15)     | -10.0 [-11.5, -8.46] | 0.67 | <0.001 | -  |
|                       | <b>- Arithmetic</b>                    |   |    |              |    |              |                      |      |        |    |
|                       | Healthy controls                       | 1 | 26 | 89.0 (4.00)  | 26 | 92.0 (3.00)  | -3.00 [-4.92, -1.08] | 0.39 | 0.002  | -  |
|                       | Normative data                         | 1 | 26 | 89.0 (4.00)  | -  | 100 (15)     | -11.0 [-12.5, -9.46] | 0.73 | <0.001 | -  |
|                       | <b>- Spelling</b>                      |   |    |              |    |              |                      |      |        |    |
|                       | Healthy controls                       | 1 | 26 | 85.0 (4.00)  | 26 | 90.0 (3.00)  | -5.00 [-6.92, -3.08] | 0.14 | <0.001 | -  |
|                       | Normative data                         | 1 | 26 | 85.0 (4.00)  | -  | 100 (15)     | -15.0 [-16.5, -13.5] | 1.00 | <0.001 | -  |
|                       | TONI-2 percentiles                     | 1 | 26 | 27.0 (4.00)  | 26 | 32.0 (5.00)  | -5.00 [-7.46, -2.54] | 0.48 | <0.001 | -  |
| Cognitive development | Bayley/McCarthy                        | 1 | 16 | 67.6 (17.3)  | -  | 100 (16)     | -32.4 [-40.9, -23.9] | 1.94 | <0.001 | -  |

Supplemental material is neither peer-reviewed nor thoroughly edited by CJASN. The authors alone are responsible for the accuracy and presentation of the material.

| Developmental Scales <sup>b</sup> |                               |    |             |             |             |                      |                      |        |                    |    |
|-----------------------------------|-------------------------------|----|-------------|-------------|-------------|----------------------|----------------------|--------|--------------------|----|
| TRANSPLANT RECIPIENTS             |                               |    |             |             |             |                      |                      |        |                    |    |
| Intelligence                      | Full-Scale IQ                 |    |             |             |             |                      |                      |        |                    |    |
|                                   | - Healthy controls            | 2  | 18          | 75.5 (16.6) | 32          | 109 (17.2)           | -29.4 [-53.9, -4.77] | 1.98   | 0.02               | 78 |
|                                   | - Normative data              | 7  | 153         | 88.3 (16.9) | -           | 100 (15)             | -11.2 [-17.8, -4.50] | 0.75   | 0.001              | 85 |
|                                   | Verbal IQ                     |    |             |             |             |                      |                      |        |                    |    |
|                                   | - Healthy controls            | 0  | 0           | -           | 0           | -                    | -                    | -      | -                  | -  |
|                                   | - Normative data              | 5  | 135         | 93.4 (18.2) | -           | 100 (15)             | -4.06 [-11.1, 3.03]  | 0.27   | 0.26               | 85 |
|                                   | Performance IQ                |    |             |             |             |                      |                      |        |                    |    |
|                                   | - Healthy controls            | 0  | 0           | -           | 0           | -                    | -                    | -      | -                  | -  |
|                                   | - Normative data              | 5  | 135         | 86.9 (19.6) | -           | 100 (15)             | -10.5 [-16.8, -4.13] | 0.70   | 0.001              | 78 |
|                                   | WJIE scores                   |    |             |             |             |                      |                      |        |                    |    |
|                                   | <b>- Full-scale</b>           |    |             |             |             |                      |                      |        |                    |    |
|                                   | Healthy controls              | 1  | 35          | 85.0 (26.0) | 35          | 107 (10.0)           | -22.0 [-31.2, -12.8] | 1.12   | <0.001             | -  |
|                                   | Normative data                | 1  | 35          | 85.0 (26.0) | -           | 100 (15)             | -15.0 [-23.6, -6.39] | 1.00   | <0.001             | -  |
|                                   | <b>- Verbal ability</b>       |    |             |             |             |                      |                      |        |                    |    |
|                                   | Healthy controls              | 1  | 35          | 97.0 (25.0) | 35          | 110 (13.0)           | -13.0 [-22.3, -3.66] | 0.65   | 0.006              | -  |
|                                   | Normative data                | 1  | 35          | 97.0 (25.0) | -           | 100 (15)             | -3.00 [-11.3, 5.28]  | 0.20   | 0.48               | -  |
|                                   | <b>- Thinking ability</b>     |    |             |             |             |                      |                      |        |                    |    |
|                                   | Healthy controls              | 1  | 35          | 88.0 (28.0) | 35          | 107 (10.0)           | -19.0 [-28.9, -9.15] | 0.90   | <0.001             | -  |
|                                   | Normative data                | 1  | 35          | 88.0 (28.0) | -           | 100 (15)             | -12.0 [-21.3, -2.72] | 0.80   | 0.01               | -  |
|                                   | <b>- Cognitive efficiency</b> |    |             |             |             |                      |                      |        |                    |    |
|                                   | Healthy controls              | 1  | 35          | 82.0 (25.0) | 35          | 103 (13.0)           | -21.0 [-30.3, -11.7] | 0.96   | <0.001             | -  |
|                                   | Normative data                | 1  | 35          | 82.0 (25.0) | -           | 100 (15)             | -18.0 [-26.3, -9.72] | 1.20   | <0.001             | -  |
|                                   | WISC-IV scores                |    |             |             |             |                      |                      |        |                    |    |
|                                   | <b>- Verbal Comprehension</b> |    |             |             |             |                      |                      |        |                    |    |
|                                   | Healthy controls              | 1  | 12          | 82.4 (16.6) | 9           | -                    | -                    | -      | >0.05 <sup>e</sup> | -  |
|                                   | Normative data                | 1  | 12          | 82.4 (16.6) | -           | 100 (15)             | -17.6 [-27.0, -8.21] | 1.17   | <0.001             | -  |
|                                   | <b>- Perceptual Reasoning</b> |    |             |             |             |                      |                      |        |                    |    |
|                                   | Healthy controls              | 1  | 12          | 81.8 (17.4) | 9           | 100 (no SD)          | -18.2                | -      | >0.05 <sup>e</sup> | -  |
|                                   | Normative data                | 1  | 12          | 81.8 (17.4) | -           | 100 (15)             | -18.2 [-28.0, -8.36] | 1.21   | <0.001             | -  |
|                                   | <b>- Working Memory</b>       |    |             |             |             |                      |                      |        |                    |    |
| Healthy controls                  | 1                             | 12 | 80.1 (12.3) | 9           | 92.0 (17.8) | -11.9 [-25.5, 1.65]  | 0.78                 | 0.09   | -                  |    |
| Normative data                    | 1                             | 12 | 80.1 (12.3) | -           | 100 (15)    | -19.9 [-26.9, -12.9] | 1.33                 | <0.001 | -                  |    |
| <b>- Processing Speed</b>         |                               |    |             |             |             |                      |                      |        |                    |    |
| Healthy controls                  | 1                             | 12 | 80.8 (13.9) | 9           | 96.0 (16.5) | -15.2 [-28.5, -1.86] | 1.00                 | 0.03   | -                  |    |
| Normative data                    | 1                             | 12 | 80.8 (13.9) | -           | 100 (15)    | -19.2 [-27.1, -11.3] | 1.28                 | <0.001 | -                  |    |
| KABC                              | 1                             | 12 | 94.5 (6.50) | -           | 100 (15)    | -5.50 [-14.5, 3.51]  | 0.37                 | 0.23   | -                  |    |
| CFIT 1, Sum 1 (overall)           | 1                             | 12 | 94.5 (12.2) | 12          | 100 (24)    | -5.40 [-20.6, 9.83]  | 0.29                 | 0.49   | -                  |    |
| CFIT 1, Sum 3 (fluid)             | 1                             | 15 | 98.3 (11.1) | 15          | 100 (24)    | -1.70 [-15.1, 11.7]  | 0.09                 | 0.80   | -                  |    |
| Academic achievement              | Single Word Reading           |    |             |             |             |                      |                      |        |                    |    |
|                                   | - Healthy controls            | 2  | 48          | 90.9 (10.7) | 45          | 99.9 (8.13)          | -7.06 [-8.44, -5.68] | 0.95   | <0.001             | 0  |

Supplemental material is neither peer-reviewed nor thoroughly edited by CJASN. The authors alone are responsible for the accuracy and presentation of the material.

|                    |                                              |   |    |              |    |             |                      |      |                    |    |
|--------------------|----------------------------------------------|---|----|--------------|----|-------------|----------------------|------|--------------------|----|
|                    | - Normative data                             | 2 | 48 | 90.9 (10.7)  | -  | 100 (15)    | -9.31 [-16.7, -1.90] | 0.62 | 0.01               | 54 |
|                    | Mathematics                                  |   |    |              |    |             |                      |      |                    |    |
|                    | - Healthy controls                           | 2 | 48 | 87.1 (10.3)  | 45 | 98.4 (11.0) | -10.0 [-11.4, -8.65] | 1.06 | <0.001             | 0  |
|                    | - Normative data                             | 2 | 48 | 87.1 (10.3)  | -  | 100 (15)    | -12.0 [-13.0, -11.1] | 0.80 | <0.001             | 0  |
|                    | Spelling                                     |   |    |              |    |             |                      |      |                    |    |
|                    | - Healthy controls                           | 2 | 48 | 89.7 (9.10)  | 45 | 99.4 (7.85) | -11.1 [-22.5, 0.34]  | 1.14 | 0.06               | 65 |
|                    | - Normative data                             | 2 | 48 | 89.7 (9.10)  | -  | 100 (15)    | -9.20 [-11.2, -7.25] | 0.61 | <0.001             | 6  |
|                    | <b>- Total Achievement</b>                   |   |    |              |    |             |                      |      |                    |    |
|                    | Healthy controls                             | 1 | 12 | 83.7 (17.3)  | 9  | 103 (20.2)  | -19.1 [-35.5, -2.67] | 1.03 | 0.02               | -  |
|                    | Normative data                               | 1 | 12 | 83.7 (17.3)  | -  | 100 (15)    | -16.3 [-26.1, -6.51] | 1.09 | 0.001              | -  |
|                    | TONI-2 scores                                | 1 | 36 | 35.0 (5.00)  | 36 | 56.0 (6.00) | -21.0 [-23.6, -18.5] | 3.80 | <0.001             | -  |
|                    | Peabody scores                               |   |    |              |    |             |                      |      |                    |    |
|                    | - Reading                                    | 1 | 20 | 47.8 (16.0)  | 18 | 44.7 (10.6) | 3.10 [-5.45, 11.7]   | 0.23 | 0.48               | -  |
|                    | - Mathematics                                | 1 | 20 | 46.3 (13.4)  | 18 | 42.8 (11.7) | 3.50 [-4.48, 11.5]   | 0.28 | 0.39               | -  |
|                    | - General Information                        | 1 | 20 | 39.5 (16.5)  | 18 | 42.6 (16.9) | -3.10 [-13.7, 7.54]  | 0.19 | 0.57               | -  |
| Attention          | NEPSY                                        | 1 | 33 | -0.21 (0.39) | -  | 0 (1)       | -0.21 [-0.34, -0.08] | 0.21 | 0.002              | -  |
|                    | NEPSY-II scores                              |   |    |              |    |             |                      |      |                    |    |
|                    | <b>- Auditory Attention</b>                  |   |    |              |    |             |                      |      |                    |    |
|                    | Healthy controls                             | 1 | 49 | 9.60         | 49 | 10.4        | -0.80                | -    | >0.05 <sup>f</sup> | -  |
|                    | Normative data                               | 1 | 49 | 9.60         | -  | 10 (3)      | -0.40                | 0.13 | -                  | -  |
| Executive function | BRIEF (T-scores)                             |   |    |              |    |             |                      |      |                    |    |
|                    | <b>- Behavior Regulation</b>                 |   |    |              |    |             |                      |      |                    |    |
|                    | Healthy controls                             | 1 | 9  | 48.3 (6.40)  | 9  | 45.3 (6.50) | 3.00 [-2.96, 8.96]   | 0.47 | 0.32               | -  |
|                    | Normative data                               | 1 | 9  | 48.3 (6.40)  | -  | 50 (10)     | -1.70 [-5.88, 2.48]  | 0.17 | 0.43               | -  |
|                    | <b>- Metacognition</b>                       |   |    |              |    |             |                      |      |                    |    |
|                    | Healthy controls                             | 1 | 9  | 61.4 (16.3)  | 9  | 46.7 (6.40) | 14.7 [3.26, 26.1]    | 1.19 | 0.01               | -  |
|                    | Normative data                               | 1 | 9  | 61.4 (16.3)  | -  | 50 (10)     | 11.4 [0.75, 22.1]    | 0.11 | 0.04               | -  |
|                    | <b>- Global Executive</b>                    |   |    |              |    |             |                      |      |                    |    |
|                    | Healthy controls                             | 1 | 9  | 55.8 (12.1)  | 9  | 45.7 (5.70) | 10.1 [1.36, 18.8]    | 1.07 | 0.02               | -  |
|                    | Normative data                               | 1 | 9  | 55.8 (12.1)  | -  | 50 (10)     | 5.80 [-2.11, 13.7]   | 0.58 | 0.15               | -  |
|                    | VANAT scores                                 |   |    |              |    |             |                      |      |                    |    |
|                    | - Auditory verbal (#)                        | 1 | 20 | 5.07         | 20 | 7.89        | -2.82                | -    | <0.05 <sup>g</sup> | -  |
|                    | - Visual verbal (#)                          | 1 | 20 | 5.87         | 20 | 7.92        | -2.05                | -    | <0.05 <sup>g</sup> | -  |
|                    | - Auditory written (#)                       | 1 | 20 | 5.12         | 20 | 7.68        | -2.56                | -    | <0.05 <sup>g</sup> | -  |
|                    | - Visual written (#)                         | 1 | 20 | 5.64         | 20 | 7.90        | -2.26                | -    | <0.05 <sup>g</sup> | -  |
|                    | NEPSY-II scores                              |   |    |              |    |             |                      |      |                    |    |
|                    | <b>- Auditory Attention and Response Set</b> |   |    |              |    |             |                      |      |                    |    |
|                    | Healthy controls                             | 1 | 49 | 8.70         | 49 | 10.0        | -1.30                | -    | <0.05 <sup>f</sup> | -  |
|                    | Normative data                               | 1 | 49 | 8.70         | -  | 10 (3)      | -1.30                | 0.43 | -                  | -  |
| Language           | NEPSY                                        | 1 | 33 | -0.18 (0.13) | -  | 0 (1)       | -0.18 [-0.23, -0.14] | 0.18 | <0.001             | -  |
|                    | NEPSY-II scores                              |   |    |              |    |             |                      |      |                    |    |



Supplemental material is neither peer-reviewed nor thoroughly edited by CJASN. The authors alone are responsible for the accuracy and presentation of the material.

|                   |                               |   |    |              |    |             |                      |      |                     |   |
|-------------------|-------------------------------|---|----|--------------|----|-------------|----------------------|------|---------------------|---|
|                   | <b>- Speeded Naming</b>       |   |    |              |    |             |                      |      |                     |   |
|                   | Healthy controls              | 1 | 49 | 8.20         | 49 | 9.85        | -1.65                | -    | <0.05 <sup>f</sup>  | - |
|                   | Normative data                | 1 | 49 | 8.20         | -  | 10 (3)      | -1.80                | 0.60 | -                   | - |
|                   | <b>- Instructions</b>         |   |    |              |    |             |                      |      |                     |   |
|                   | Healthy controls              | 1 | 49 | 7.10         | 49 | 10.1        | -3.00                | -    | <0.001 <sup>f</sup> | - |
|                   | Normative data                | 1 | 49 | 7.10         | -  | 10 (3)      | -2.90                | 0.97 | -                   | - |
| Memory            | WRAML scores                  |   |    |              |    |             |                      |      |                     |   |
|                   | <b>- Verbal Memory</b>        |   |    |              |    |             |                      |      |                     |   |
|                   | Healthy controls              | 1 | 9  | 88.8 (11.0)  | 9  | 101 (19.5)  | -11.9 [-26.5, 2.73]  | 0.77 | 0.11                | - |
|                   | Normative data                | 1 | 9  | 88.8 (11.0)  | -  | 100 (15)    | -11.2 [-18.4, -4.01] | 0.75 | 0.002               | - |
|                   | <b>- Visual Memory</b>        |   |    |              |    |             |                      |      |                     |   |
|                   | Healthy controls              | 1 | 9  | 88.7 (8.80)  | 9  | 86.7 (11.0) | 2.00 [-7.20, 11.2]   | 0.20 | 0.67                | - |
|                   | Normative data                | 1 | 9  | 88.7 (8.80)  | -  | 100 (15)    | -11.3 [-17.1, -5.55] | 0.75 | <0.001              | - |
|                   | <b>- Screening Memory</b>     |   |    |              |    |             |                      |      |                     |   |
|                   | Healthy controls              | 1 | 9  | 86.6 (9.40)  | 9  | 92.7 (14.2) | -6.10 [-17.2, 5.03]  | 0.51 | 0.28                | - |
|                   | Normative data                | 1 | 9  | 86.6 (9.40)  | -  | 100 (15)    | -13.4 [-19.5, -7.26] | 0.89 | <0.001              | - |
|                   | NEPSY                         | 1 | 33 | -0.38 (0.22) | -  | 0 (1)       | -0.38 [-0.46, -0.31] | 0.38 | <0.001              | - |
|                   | NEPSY-II scores               |   |    |              |    |             |                      |      |                     |   |
|                   | <b>- Memory for Designs</b>   |   |    |              |    |             |                      |      |                     |   |
|                   | Healthy controls              | 1 | 49 | 8.70         | 49 | 9.70        | -1.00                | -    | >0.05 <sup>f</sup>  | - |
|                   | Normative data                | 1 | 49 | 8.70         | -  | 10 (3)      | -1.30                | 0.43 | -                   | - |
|                   | <b>- Memory for Faces</b>     |   |    |              |    |             |                      |      |                     |   |
|                   | Healthy controls              | 1 | 49 | 8.20         | 49 | 9.00        | -0.80                | -    | >0.05 <sup>f</sup>  | - |
|                   | Normative data                | 1 | 49 | 8.20         | -  | 10 (3)      | -1.80                | 0.60 | -                   | - |
|                   | <b>- Word List Inference</b>  |   |    |              |    |             |                      |      |                     |   |
|                   | Healthy controls              | 1 | 49 | 8.00         | 49 | 10.2        | -2.20                | -    | <0.01 <sup>f</sup>  | - |
|                   | Normative data                | 1 | 49 | 8.00         | -  | 10 (3)      | -2.00                | 0.67 | -                   | - |
| Social cognition  | NEPSY-II scores               |   |    |              |    |             |                      |      |                     |   |
|                   | <b>- Affect Recognition</b>   |   |    |              |    |             |                      |      |                     |   |
|                   | Healthy controls              | 1 | 49 | 8.10         | 49 | 10.3        | -2.20                | -    | <0.001 <sup>f</sup> | - |
|                   | Normative data                | 1 | 49 | 8.10         | -  | 10 (3)      | -1.90                | 0.63 | -                   | - |
| Visuomotor skills | NEPSY                         | 1 | 33 | -0.47 (0.26) | -  | 0 (1)       | -0.47 [-0.97, 0.03]  | 0.47 | 0.07                | - |
|                   | NEPSY-II scores               |   |    |              |    |             |                      |      |                     |   |
|                   | <b>- Design Copying</b>       |   |    |              |    |             |                      |      |                     |   |
|                   | Healthy controls              | 1 | 49 | 6.10         | 49 | 9.10        | -3.00                | -    | <0.001 <sup>f</sup> | - |
|                   | Normative data                | 1 | 49 | 6.10         | -  | 10 (3)      | -3.00                | 1.00 | -                   | - |
|                   | <b>- Geometric Puzzles</b>    |   |    |              |    |             |                      |      |                     |   |
|                   | Healthy controls              | 1 | 49 | 7.90         | 49 | 9.90        | -2.00                | -    | <0.01 <sup>f</sup>  | - |
|                   | Normative data                | 1 | 49 | 7.90         | -  | 10 (3)      | -2.10                | 0.70 | -                   | - |
|                   | <b>- Visuomotor Precision</b> |   |    |              |    |             |                      |      |                     |   |
|                   | Healthy controls              | 1 | 49 | 7.30         | 49 | 9.80        | -2.50                | -    | <0.001 <sup>f</sup> | - |
|                   | Normative data                | 1 | 49 | 7.30         | -  | 10 (3)      | -2.70                | 0.90 | -                   | - |

Supplemental material is neither peer-reviewed nor thoroughly edited by CJASN. The authors alone are responsible for the accuracy and presentation of the material.

| TABLE 2.2 Clinical outcomes – comparison between CKD stages |                             |                                                   |      |              |             |              |                          |                         |                    |                    |
|-------------------------------------------------------------|-----------------------------|---------------------------------------------------|------|--------------|-------------|--------------|--------------------------|-------------------------|--------------------|--------------------|
| Outcome                                                     | Domains                     | N (studies)                                       | N    | Mean (SD)    | N           | Mean (SD)    | Mean difference [95% CI] | Effect size (Cohen's d) | P                  | I <sup>2</sup> (%) |
| <b>PREDIALYSIS vs DIALYSIS</b>                              |                             |                                                   |      |              |             |              |                          |                         |                    |                    |
| Intelligence                                                | Full-Scale IQ               | 1                                                 | 12   | 86.7 (7.90)  | 12          | 75.5 (12.2)  | 11.2 [2.98, 19.4]        | 1.09                    | 0.008              | -                  |
|                                                             | Verbal IQ                   | 1                                                 | 12   | 88.2 (17.1)  | 12          | 76.7 (6.50)  | 11.5 [1.15, 21.9]        | 0.89                    | 0.03               | -                  |
|                                                             | Performance IQ              | 1                                                 | 12   | 79.8 (11.0)  | 12          | 73.8 (10.1)  | 6.00 [-2.45, 14.5]       | 0.57                    | 0.16               | -                  |
|                                                             | Cognitive development       | Bayley/McCarthy Developmental Scales <sup>b</sup> | 1    | 15           | 90.3 (14.3) | 16           | 67.6 (17.3)              | 22.7 [11.6, 33.9]       | 1.43               | <0.001             |
| <b>PREDIALYSIS vs. TRANSPLANT</b>                           |                             |                                                   |      |              |             |              |                          |                         |                    |                    |
| Intelligence                                                | Full-Scale IQ               | 1                                                 | 28   | 87.2 (17.8)  | 6           | 72.8 (20.0)  | 14.3 [-2.95, 31.6]       | 0.76                    | 0.10               | -                  |
| Attention regulation                                        | Conners' CPT                |                                                   |      |              |             |              |                          |                         |                    |                    |
|                                                             | - Correct hits (#)          | 1                                                 | 9    | 293 (44.0)   | 9           | 311 (22.0)   | -18.0 [-50.1, 14.1]      | 0.52                    | 0.27               | -                  |
|                                                             | - False alarms (#)          | 1                                                 | 9    | 14.0 (9.00)  | 9           | 13.0 (9.00)  | 1.00 [-7.32, 9.32]       | 0.11                    | 0.81               | -                  |
|                                                             | - Reaction times (s)        | 1                                                 | 9    | 0.47 (0.10)  | 9           | 0.38 (0.72)  | 0.09 [-0.38, 0.56]       | 0.18                    | 0.71               | -                  |
|                                                             | - Discrimination (Z-scores) | 1                                                 | 9    | 2.19 (1.29)  | 9           | 0.62 (1.55)  | -0.76 [-1.97, 0.45]      | 1.05                    | 0.22               | -                  |
| Executive function                                          | PASAT, ChiPASAT (Z-scores)  | 1                                                 | 9    | -0.07 (1.42) | 9           | -0.41 (0.62) | 0.34 [-0.67, 1.35]       | 0.31                    | 0.51               | -                  |
|                                                             | VANAT scores                |                                                   |      |              |             |              |                          |                         |                    |                    |
|                                                             | - Auditory verbal (#)       | 1                                                 | 20   | 4.56         | 20          | 5.07         | -0.51                    | -                       | <0.05 <sup>§</sup> | -                  |
|                                                             | - Visual verbal (#)         | 1                                                 | 20   | 4.65         | 20          | 5.87         | -1.22                    | -                       | <0.05 <sup>§</sup> | -                  |
|                                                             | - Auditory written (#)      | 1                                                 | 20   | 5.01         | 20          | 5.12         | -0.11                    | -                       | <0.05 <sup>§</sup> | -                  |
| - Visual written (#)                                        | 1                           | 20                                                | 4.78 | 20           | 5.64        | -0.86        | -                        | <0.05 <sup>§</sup>      | -                  |                    |
| <b>TRANSPLANT vs. DIALYSIS</b>                              |                             |                                                   |      |              |             |              |                          |                         |                    |                    |
| Intelligence                                                | Full-Scale IQ               | 1                                                 | 13   | 103 (12.0)   | 11          | 92.9 (16.9)  | 10.1 [-1.81, 22.0]       | 0.69                    | 0.10               | -                  |
|                                                             | Verbal IQ                   | 1                                                 | 13   | 103 (13.5)   | 11          | 91.6 (16.6)  | 11.4 [-0.88, 23.6]       | 0.75                    | 0.07               | -                  |
|                                                             | Performance IQ              | 1                                                 | 13   | 103 (14.4)   | 11          | 96.0 (17.4)  | 7.08 [-5.86, 20.0]       | 0.44                    | 0.28               | -                  |
| Academic achievement                                        | WJ-R scores                 |                                                   |      |              |             |              |                          |                         |                    |                    |
|                                                             | - Reading                   | 1                                                 | 13   | 16.4 (7.66)  | 11          | 15.6 (7.70)  | 0.77 [-5.40, 6.94]       | 0.10                    | 0.81               | -                  |
|                                                             | - Mathematics               | 1                                                 | 13   | 16.1 (7.78)  | 11          | 13.8 (5.82)  | 2.34 [-3.11, 7.79]       | 0.33                    | 0.40               | -                  |
|                                                             | - Written                   | 1                                                 | 13   | 16.2 (9.05)  | 11          | 11.2 (7.18)  | 5.00 [-1.50, 11.5]       | 0.61                    | 0.13               | -                  |
|                                                             | WRAT scores                 |                                                   |      |              |             |              |                          |                         |                    |                    |
|                                                             | - Reading                   | 1                                                 | 36   | 93.0 (3.00)  | 26          | 90.0 (4.00)  | 3.00 [-1.18, 4.82]       | 0.85                    | 0.001              | -                  |
|                                                             | - Arithmetic                | 1                                                 | 36   | 88.0 (3.00)  | 26          | 89.0 (4.00)  | -1.00 [-2.82, 0.82]      | 0.28                    | 0.28               | -                  |
|                                                             | - Spelling                  | 1                                                 | 36   | 91.0 (3.00)  | 26          | 85.0 (4.00)  | 6.00 [4.18, 7.82]        | 0.65                    | <0.001             | -                  |
|                                                             | TONI-2 percentiles          | 1                                                 | 36   | 35.0 (5.00)  | 26          | 27.0 (4.00)  | 8.00 [5.76, 10.2]        | 0.66                    | <0.001             | -                  |

IQ: Intelligence Quotient – scoring mean 100, SD 15 (80-89 low average, 90-109 average, 110-119 high average)

\*Crittenden 1985: used 6 outcome measures to assess full-scale IQ in patients with end-stage kidney disease (see Supp. Table 2)

Bender-Gestalt: Bender Visual Motor Gestalt Test – scoring focussed on examinee's specific difficulties and behavior (Gulleroglu 2013 – results below)

- CKD (n=20) – abnormal in 12 patients (60%); controls (n=18) – abnormal in 3 patients (15%); **relative risk** = 4.00 [95% CI: 1.33, 12.1], p=0.01

Supplemental material is neither peer-reviewed nor thoroughly edited by CJASN. The authors alone are responsible for the accuracy and presentation of the material.

- Transplant (n=20) – abnormal in 8 patients (40%); controls (n=18) – abnormal in 3 patients (15%); **relative risk** = 2.67 [95% CI: 0.82, 8.62], p=0.10
- CKD (n=20) – abnormal in 12 patients (60%); transplant (n=20) – abnormal in 8 patients (40%); **relative risk** = 1.50 [95% CI: 0.79, 2.86], p=0.22

BRIEF: Behavior Rating Inventory of Executive Function – T scores = mean 50, SD 10 (higher scores reflect more impairment)

CFIT: Culture Fair Intelligence Test - # of correct responses, or scoring mean 100, SD 24

ChiPASAT: Children’s Paced Auditory Serial Addition Task – Z-scores = mean 0, SD 1 (higher scores reflect less impairment)

CKD: chronic kidney disease

Conners’ CPT: Conners’ Continuous Performance Test – T-scores = mean 50, SD 10 (higher scores reflect more impairment)

CPT: Continuous Performance Test – number of hits out of 20 (Fennell 1984)

Digit Span: Subtest of WISC – scoring mean 10, SD 3

EOWPVT: Expressive One Word Picture Vocabulary Test – scoring mean 100, SD 15

GDS: Gordon Diagnostic System – scoring mean 100, SD 15

HRPS Category Test: Halstead-Reitan Problem Solving Category Test – scores above 41 suggest brain impairment for ages 15-45 years

KABC: Kaufmann Assessment Battery for Children – scoring mean 100, SD 15

NEPSY: Finnish Neuropsychological Test Battery for Children – standard deviation scale +1 to -3 (0 to +1 for normal, -1 to -3 for increasing impairment)

NEPSY-II: Finnish Neuropsychological Test Battery for Children – scoring mean 10, SD 3

NSRT: Nonverbal Selective Reminding Test – Z scores = mean 0, SD 1 (higher scores reflect less impairment)

PASAT: Paced Auditory Serial Addition Test – Z-scores = mean 0, SD 1 (higher scores reflect less impairment)

Peabody: Peabody Individual Achievement Test – uncertain scoring presentation by Fennell 1984

Penn CNB: Penn’s Computerized Neurocognitive Battery – scoring presentation as Z-score differences between patient cohorts

TONI-2: Test of Nonverbal Intelligence, Second Edition – scoring by percentile ranks (mean 50)

VANAT: Visual and Auditory Number Assay Test – scoring by number of repeated digits correctly recorded

WJ-R: Woodcock-Johnson Tests of Cognitive Abilities, Revised Edition – scoring by age-equivalent scores

WIAT: Wechsler Individual Achievement Test – scoring mean 100, SD 15 (80-89 low average, 90-109 average, 110-119 high average)

WRAML: Wide Range Assessment of Memory and Learning – scoring mean 10, SD 3 (6.0-7.9 low average, 8.0-11.9 average, 12.0-13.9 high average)

WRAT: Wide Range Achievement Test – scoring mean 100, SD 15 (80-89 low average, 90-109 average, 110-119 high average)

WRMT-R: Woodcock Reading Mastery Tests-Revised – scoring mean 100, SD 15 (80-89 low average, 90-109 average, 110-119 high average)

<sup>a</sup> Domains in Mirsky’s model of attention (Duquette 2008)

<sup>b</sup> Cognitive development - scoring mean 100, SD 16

<sup>c</sup> Two studies used the EOWPVT, but results were not reported in one study (Bawden 2004)

<sup>d</sup> Results reported as Z-score differences in Hartung 2016

<sup>e</sup> WISC-IV scores for Verbal Comprehension and Perceptual Reasoning Indices not given in Johnson 2013; p-values as reported in study

<sup>f</sup> p-values reported by Haavisto 2012

<sup>g</sup> p-values reported by Gulleroglu 2013

*Supplemental material is neither peer-reviewed nor thoroughly edited by CJASN. The authors alone are responsible for the accuracy and presentation of the material.*

*NB// Missing data in:*

- *El-Shazly 2010: IQ scores*
- *Fennell 1990: only p-values reported for all outcomes*
- *Gipson 2006: IQ scores*
- *Gulleroglu: Cancellation Test results*
- *Haavisto 2012: SD for all outcomes*
- *Hartung 2016: Z-scores for all outcomes*
- *Hartung 2014: mean and SD for all outcomes*
- *Hulstijn-Dirkmaat 1992: SD not reported for all outcomes*
- *Mendley 2015: mean and SD for all outcomes)*
- *Mendley 1999: results for the Stroop Color-Word Naming Test, Buschke Selective Reminding Test, Meier Visual Discrimination Test, Grooved Pegboard Test, and the Trail-making Test*
- *Rasbury 1983: results for the Free Recall Memory Task*

**Supplementary Figure 1.1: Single Word Reading Accuracy - Predialysis vs normative data**

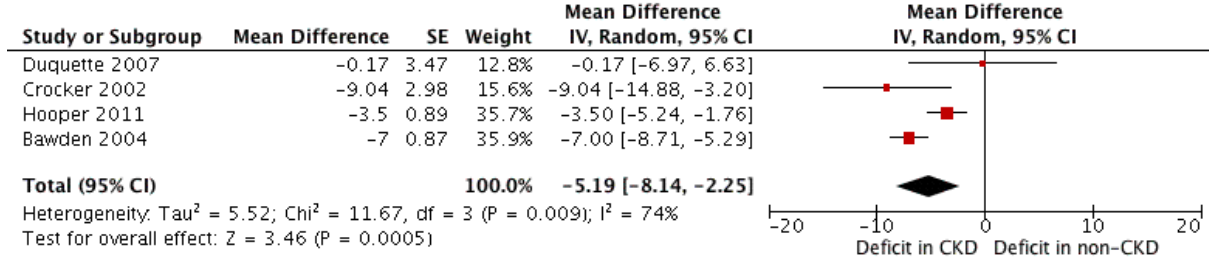

**Supplementary Figure 1.2: Reading Comprehension - Predialysis vs normative data**

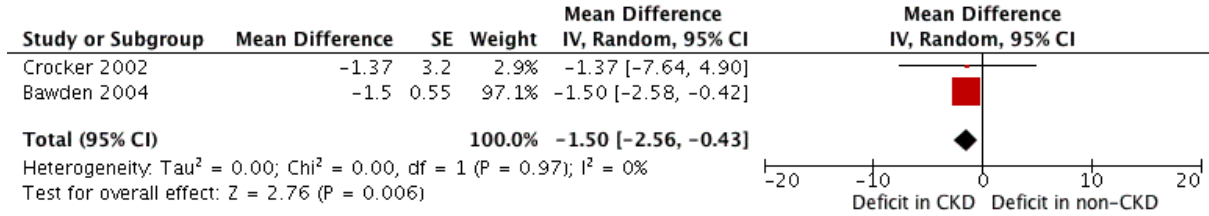

**Supplementary Figure 1.3: Mathematics - Predialysis vs normative data**

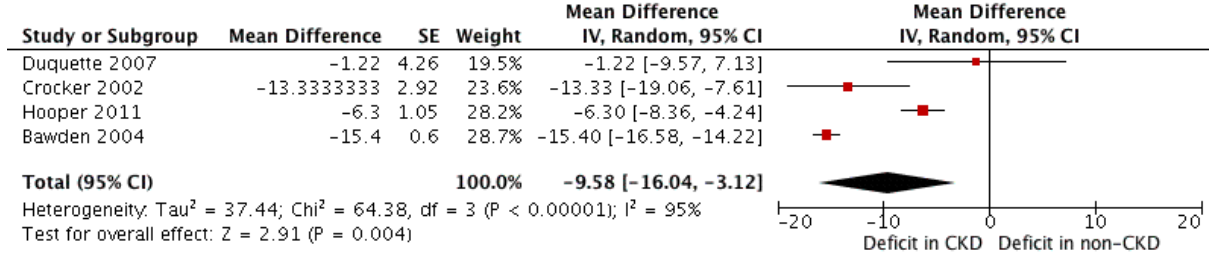

**Supplementary Figure 1.4: Spelling - Predialysis vs normative data**

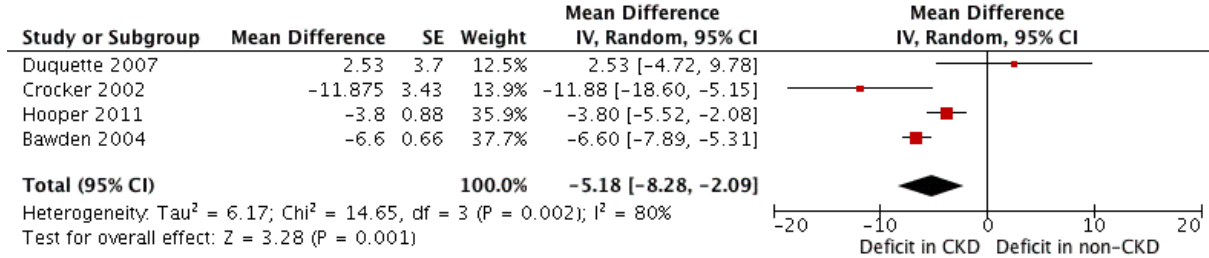

**Supplementary Table 4: Funnel plots (full-scale IQ)**

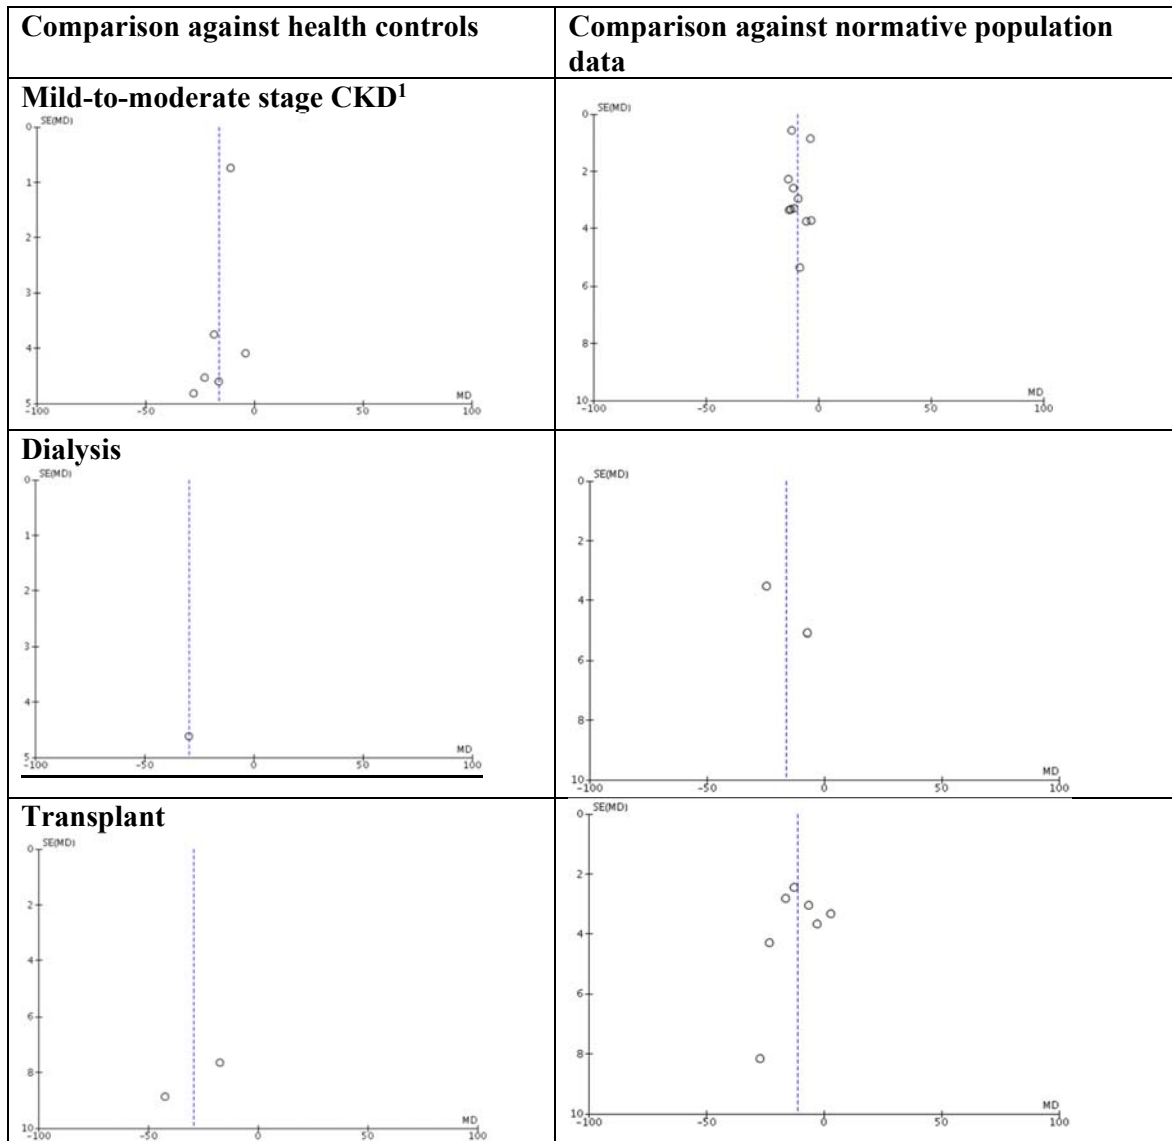

<sup>1</sup>CKD: chronic kidney disease
