# Supplementary material
Source: PubMed Central journal article supplement (PMC5967677)
Supplement: CJN.09650917SupplementaryData2.pdf [file CJN.09650917SupplementaryData2.pdf]

## Author list

Kerry Chen<sup>1,2</sup>, Madeleine Didsbury<sup>1,2</sup>, Anita van Zwieten<sup>1,2</sup>, Martin Howell<sup>1,2</sup>, Siah Kim<sup>1</sup>, Allison Tong<sup>1,2</sup>, Kirsten Howard<sup>2</sup>, Natasha Nassar<sup>3</sup>, Belinda Barton<sup>4</sup>, Suncica Lah<sup>5</sup>, Jennifer Lorenzo<sup>6</sup>, Giovanni Strippoli<sup>7</sup>, Suetonia Palmer<sup>8</sup>, Armando Teixeira-Pinto<sup>2</sup>, Fiona Mackie<sup>9</sup>, Steven McTaggart<sup>10</sup>, Amanda Walker<sup>11</sup>, Tonya Kara<sup>12</sup>, Jonathan C. Craig<sup>1,2</sup>, Germaine Wong<sup>1,2,13</sup>

<sup>1</sup>Centre for Kidney Research, The Kids Research Institute, The Children's Hospital at Westmead, Sydney, Australia

<sup>2</sup>Sydney School of Public Health, The University of Sydney, Sydney, Australia

<sup>3</sup>Menzies Centre for Health Policy, Sydney School of Public Health, The University of Sydney, Sydney, Australia

<sup>4</sup>Children's Hospital Education Research Institute, The Children's Hospital at Westmead, Sydney, Australia

<sup>5</sup>School of Psychology, The University of Sydney, Sydney, Australia, and the Australian Research Council Centre of Excellence in Cognition and its Disorders, Macquarie University, Sydney, Australia

<sup>6</sup>Institute for Neuroscience and Muscle Research, The Children's Hospital at Westmead, Sydney, Australia

<sup>7</sup>Department of Emergency and Organ Transplantation, University of Bari, Bari, Italy

<sup>8</sup>Department of Medicine, University of Otago, Christchurch, New Zealand

<sup>9</sup>Department of Renal Medicine, Sydney Children's Hospital at Randwick, Sydney, Australia

<sup>10</sup>Child and Adolescent Renal Service, Children's Health Queensland, Brisbane, Australia

<sup>11</sup>Department of Renal Medicine, The Royal Children's Hospital, Melbourne, Australia

<sup>12</sup>Department of Nephrology, Starship Children's Hospital, Auckland, New Zealand

<sup>13</sup>Centre for Transplant and Renal Research, Westmead Hospital, Sydney, Australia
